# Supplementary material for: A greener procedure for the synthesis of α-ureidophosphonates under ultrasound irradiation. An X-ray crystallographic study
Source: Royal Society of Chemistry journal article supplement (doi:10.1039/c5ra19886k), 2015-01-01
Supplement: c5ra19886k1.pdf [file c5ra19886k1.pdf]

## Supporting Information

### **A greener procedure for the synthesis of $\alpha$ -ureidophosphonates under ultrasound irradiation. X-ray crystallographic study**

**Abdeslem Bouzina<sup>a</sup>, Malika Berredjem<sup>a\*</sup>, Sofiane Bouacida<sup>b,c</sup>, Hocine Merazig<sup>c</sup> and Nour-Eddine Aouf<sup>a</sup>**

*<sup>a</sup>Laboratory of Applied Organic Chemistry, Synthesis of biomolecules and molecular modelling Group, Sciences Faculty, Chemistry Department, BadjiMokhtar - Annaba University, Box 12, 23000 Annaba, Algeria*

*<sup>b</sup>Département sciences de la matière, université Oum El Bouaghi, 04000 Oum El Bouaghi, Algérie.*

*<sup>c</sup>Unité de Recherche de Chimie de l'Environnement et Moléculaire Structurale, Université Constantine 1. Constantine 25000, Algérie.*

\* Corresponding author. Address: Laboratory of Applied Organic Chemistry, Badji-Mokhtar University, BP 12 El-Hadjjar, Annaba 23000, Algeria. Tel.: +213 773 875 634; fax: +213 38 872 789.

Email: [mberredjem@yahoo.fr](mailto:mberredjem@yahoo.fr), [malika.berredjem@univ-annaba.org](mailto:malika.berredjem@univ-annaba.org)

|                                                                                                                     |    |
|---------------------------------------------------------------------------------------------------------------------|----|
| <b>1. General data</b> .....                                                                                        | 2  |
| <b>2. Crystallograph</b> .....                                                                                      | 2  |
| <b>3. Typical experimental procedure for the synthesis of <math>\alpha</math>-ureidophosphonates</b> .....          | 3  |
| <i>Scheme 1. synthesis of <math>\alpha</math>-ureidophosphonates under ultrasound irradiation</i> .....             | 3  |
| <i>Scheme 2. Mechanistic proposal for the synthesis of <math>\alpha</math>-ureidophosphonates</i> .....             | 3  |
| <b>4. Spectral Data</b> .....                                                                                       | 4  |
| <br>                                                                                                                |    |
| <b><math>^1\text{H}</math> NMR spectrum:</b> Diethyl [ $\alpha$ -ureido-(phenyl)]methylphosphonate.....             | 10 |
| <b><math>^{13}\text{C}</math> NMR spectrum:</b> Diethyl [ $\alpha$ -ureido-(phenyl)]methylphosphonate.....          | 10 |
| <b><math>^{31}\text{P}</math> NMR spectrum:</b> Diethyl [ $\alpha$ -ureido-(phenyl)]methylphosphonate.....          | 11 |
| <b>IR spectrum:</b> Diethyl [ $\alpha$ -ureido-(phenyl)]methylphosphonate.....                                      | 11 |
| <b><math>^1\text{H}</math> NMR spectrum:</b> Diethyl [ $\alpha$ -ureido-(4-methylphenyl)]methylphosphonate.....     | 12 |
| <b><math>^{31}\text{P}</math> NMR spectrum:</b> Diethyl [ $\alpha$ -ureido-(4-methylphenyl)]methylphosphonate.....  | 12 |
| <b>IR spectrum:</b> Diethyl [ $\alpha$ -ureido-(4-methylphenyl)]methylphosphonate.....                              | 13 |
| <b>MS:</b> Diethyl [ $\alpha$ -ureido-(4-methylphenyl)]methylphosphonate.....                                       | 13 |
| <b><math>^1\text{H}</math> NMR spectrum:</b> Diethyl [ $\alpha$ -ureido-(2-chlorophenyl)]methylphosphonate.....     | 14 |
| <b><math>^{13}\text{C}</math> NMR spectrum:</b> Diethyl [ $\alpha$ -ureido-(2-chloro phenyl)]methylphosphonate..... | 14 |
| <b><math>^{31}\text{P}</math> NMR spectrum:</b> Diethyl [ $\alpha$ -ureido-(2-chloro phenyl)]methylphosphonate..... | 15 |
| <b>IR spectrum:</b> Diethyl [ $\alpha$ -ureido-(2-chloro phenyl)]methylphosphonate.....                             | 15 |
| <b>MS:</b> Diethyl [ $\alpha$ -ureido-(2-chlorophenyl)]methylphosphonate.....                                       | 16 |
| <b><math>^1\text{H}</math> NMR spectrum:</b> Diethyl [ $\alpha$ -ureido-(4-fluorophenyl)]methylphosphonate.....     | 16 |
| <b><math>^{13}\text{C}</math> NMR spectrum:</b> Diethyl [ $\alpha$ -ureido-(4-fluorophenyl)]methylphosphonate.....  | 17 |
| <b><math>^{31}\text{P}</math> NMR spectrum:</b> Diethyl [ $\alpha$ -ureido-(4-fluorophenyl)]methylphosphonate.....  | 17 |
| <b>IR spectrum:</b> Diethyl [ $\alpha$ -ureido-(4-fluorophenyl)]methylphosphonate.....                              | 18 |
| <b><math>^1\text{H}</math> NMR spectrum:</b> Diethyl [ $\alpha$ -ureido-(4-bromophenyl)]methylphosphonate.....      | 18 |
| <b>IR spectrum:</b> Diethyl [ $\alpha$ -ureido-(4-bromophenyl)]methylphosphonate.....                               | 19 |
| <b><math>^1\text{H}</math> NMR spectrum:</b> Diethyl [ $\alpha$ -ureido-(4-nitrophenyl)]methylphosphonate.....      | 19 |
| <b><math>^{13}\text{C}</math> NMR spectrum:</b> Diethyl [ $\alpha$ -ureido-(4-nitrophenyl)]methylphosphonate.....   | 20 |
| <b><math>^{31}\text{P}</math> NMR spectrum:</b> Diethyl [ $\alpha$ -ureido-(4-nitrophenyl)]methylphosphonate.....   | 20 |
| <b>IR spectrum:</b> Diethyl [ $\alpha$ -ureido-(4-nitrophenyl)]methylphosphonate.....                               | 21 |
| <b><math>^1\text{H}</math> NMR spectrum:</b> Diethyl [ $\alpha$ -ureido-(4-chlorophenyl)]methylphosphonate.....     | 21 |
| <b><math>^{13}\text{C}</math> NMR spectrum:</b> Diethyl [ $\alpha$ -ureido-(4-chloro phenyl)]methylphosphonate..... | 22 |

|                                                                                               |    |
|-----------------------------------------------------------------------------------------------|----|
| <b>IR spectrum:</b> Diethyl [ $\alpha$ -ureido-(4-chloro phenyl)]methylphosphonate.....       | 22 |
| <b>MS:</b> Diethyl [ $\alpha$ -ureido-(4-chlorophenyl)]methylphosphonate.....                 | 23 |
| <b>IR spectrum:</b> Diethyl [ $\alpha$ -ureido-(4-dimethylaminophenyl)]methylphosphonate..... | 23 |
| <b>MS:</b> Diethyl [ $\alpha$ -ureido-(4-dimethylaminophenyl)]methylphosphonate.....          | 24 |
| <b>IR spectrum:</b> Diethyl [ $\alpha$ -ureido-(4-isopropylphenyl)]methylphosphonate.....     | 25 |
| <b>MS:</b> Diethyl [ $\alpha$ -ureido-(4-isopropylphenyl)]methylphosphonate.....              | 26 |
| <b>IR spectrum:</b> Diethyl [ $\alpha$ -ureido-(4-methoxyphenyl)]methylphosphonate.....       | 26 |
| <b>MS:</b> Diethyl [ $\alpha$ -ureido-(4-methoxyphenyl)]methylphosphonate.....                | 27 |

### 1. General data

All chemicals and solvents were purchased from common commercial sources and were used as received without any further purification. All reactions were monitored by TLC on silica Merck 60 F<sub>254</sub> percolated aluminum plates and were developed by spraying with ninhydrin solution. Column chromatography was performed with Merck silica gel (230-400 mesh). Proton nuclear magnetic resonance (<sup>1</sup>H NMR) spectra were recorded on a Brücker or Jeol spectrometer at 250, or 400 MHz. Chemical shifts is reported in  $\delta$  units (ppm) with TMS as reference ( $\delta$  0.00). All coupling constants (*J*) are reported in Hertz. Multiplicity is indicated by one or more of the following: s (singlet), d (doublet), t (triplet), q (quartet), m (multiplet). Carbon nuclear magnetic resonance (<sup>13</sup>C NMR) spectra were recorded on a Brücker or Jeol at 60, 75 or 100 MHz. Chemical shifts are reported in  $\delta$  units (ppm) relative to CDCl<sub>3</sub> ( $\delta$  77.0). Phosphorus nuclear magnetic resonance (<sup>31</sup>P NMR) spectra were recorded on a Brücker or Jeol at 75, 100 or 161 MHz. Infrared spectra were recorded on a Perkin Elmer 600 spectrometer. Elemental analysis was recorded on a EURO E.A 3700. Melting points were recorded on a Büchi B-545 apparatus in open capillary tubes. Ultrasound assisted reactions were carried out using a FUNGILAB ultrasonic bath with a frequency of 40 kHz and a nominal power of 250 W. The reactions were carried out in an open glass tube (diameter: 25 mm; thickness: 1 mm; volume: 20 mL) at 75°.

### 2. Crystallography

A single crystal of the studied compound, 13b, C<sub>15</sub>H<sub>24</sub>N<sub>2</sub>O<sub>4</sub>P, with dimensions of 0.06×0.11×0.13 mm<sup>3</sup>, was selected for single crystal X-ray diffraction analysis. Data collection was performed, at 295(2)K, on a Bruker APEX II diffractometer, CCD area detector equipped with a graphite monochromatized MoK $\alpha$  radiation ( $\lambda$ = 0.71073Å). **Crystallographic data** for 13b: C<sub>15</sub>H<sub>24</sub>N<sub>2</sub>O<sub>4</sub>P, M = 327.33, T = 295(2) K, monoclinic, space group P21/n (no. 14), a = 9.6789(5), b = 9.1089(4), c = 20.6717(9)Å,  $\beta$ =93.303(2)°, V = 1819.48(15) Å<sup>3</sup>, Z = 4, Dc =

1.195 Mg m<sup>-3</sup>,  $\mu = 0.169$  mm<sup>-1</sup>, independent reflections = 3602 [R<sub>int</sub> = 0.0379], R1 [for 2291 reflections with I > 2 $\sigma$ (I)] = 0.0675, wR2 (all data) = 0.1907).

### 3. Typical experimental procedure for the synthesis of $\alpha$ -ureidophosphonates

In a glass tube (diameter: 25 mm; thickness: 1 mm; volume: 20 mL) taken a mixture of aldehyde (1 mmol) and urea (1 mmol) at 75° C, (1 mmol) triethylphosphite was added. The reaction mixture was subjected to the ultrasonication with a frequency of 40 kHz for appropriate time. After completion of the reaction, as indicated by TLC, silica gel; dichloromethane:methanol (9:1), a (6:4) mixture of diethyl ether and n-hexane was added to the reaction mixture and pure product was crystallized to 6° C overnight. The product was finally filtered and dried.

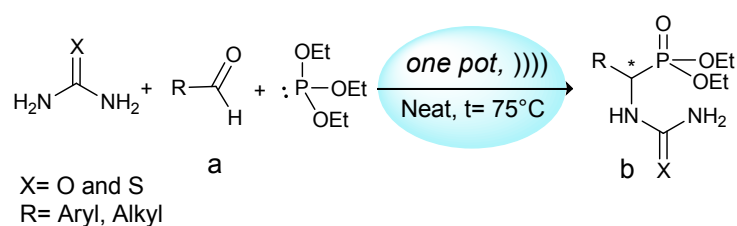

**Scheme 1** Synthesis of  $\alpha$ -ureidophosphonates under ultrasound irradiation.

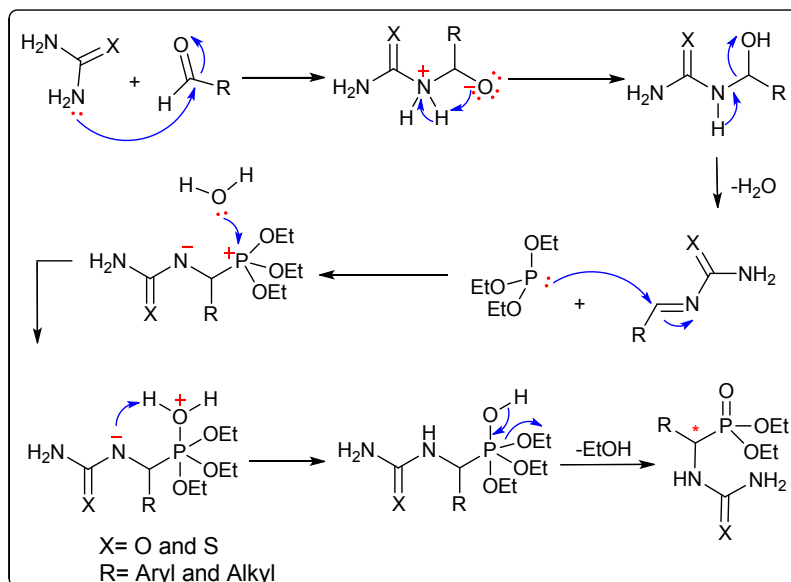

**Scheme 2** Mechanistic proposal for the synthesis of  $\alpha$ -ureidophosphonates.

#### 4. Spectral data

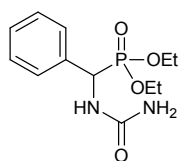

##### Diethyl [ $\alpha$ -ureido-(phenyl)]methylphosphonate (Table 2, Entry 1b)

White solid. Yield 85 %. M.p. 197-199 °C.  $R_f = 0.41$  ( $\text{CH}_2\text{Cl}_2/\text{MeOH}:95/05$ ).  $\nu_{\text{max}}(\text{KBr}/\text{cm}^{-1})$  3433.35, 3315.6, 3224.56, 1686.37, 1235.85, 1023.  $\delta_{\text{P}}(120 \text{ MHz}, \text{CDCl}_3)$  21.61 ppm.  $\delta_{\text{H}}(400 \text{ MHz}, \text{CDCl}_3)$  1.032 (t,  $J$  7.20 Hz, 3H,  $\text{CH}_3\text{-CH}_2\text{O}$ ), 1.29 (t,  $J$  6.89 Hz, 3H,  $\text{CH}_3\text{-CH}_2\text{O}$ ), 3.60-3.64 (m, 1H,  $\text{CH}_2\text{-O}$ ), 3.85-3.89 (m, 1H,  $\text{CH}_2\text{-O}$ ), 4.06-4.17 (m, 2H,  $\text{CH}_2\text{-O}$ ), 5.14 (s, 2H, NH), 5.17-5.21 (dd,  $J_1$  8.00,  $J_2$  17.45 Hz, 1H,  $\text{CH}^*$ ), 7.12-7.23 (m, 5H, H-Ar), 7.26 (s, 1H, NH) ppm.  $\delta_{\text{C}}(100 \text{ MHz}, \text{CDCl}_3)$  16.32, 16.59, 54.05, 63.96, 64.11, 124.46, 126.31, 126.36, 126.75, 126.9, 134.24, 159.05 ppm. Ms (m/z): 287 (M+1). Anal. Calc. for  $\text{C}_{12}\text{H}_{19}\text{N}_2\text{O}_4\text{P}$ : C, 50.35; H, 6.69; N, 9.79. Found: C, 50.30; H, 6.73; N, 9.85.

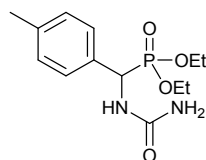

##### Diethyl [ $\alpha$ -ureido-(4-methylphenyl)]methyl phosphonate (Table 2, Entry 2b)

White solid. Yield 78 %. M.p. 184-186 °C.  $R_f = 0.43$  ( $\text{CH}_2\text{Cl}_2/\text{MeOH}:95/05$ ).  $\nu_{\text{max}}(\text{KBr}/\text{cm}^{-1})$  3433.33, 3315.93, 3264.5, 1666.37, 1235.85.  $\delta_{\text{P}}(120 \text{ MHz}, \text{CDCl}_3)$  20.61 ppm.  $\delta_{\text{H}}(250 \text{ MHz}, \text{CDCl}_3)$  1.08 (t,  $J$  7.12 Hz, 3H,  $\text{CH}_3\text{-CH}_2\text{O}$ ), 1.32 (t,  $J$  6.94 Hz, 3H,  $\text{CH}_3\text{-CH}_2\text{O}$ ), 2.38 (s, 3H,  $\text{CH}_3\text{-CAr}$ ), 3.68-3.72 (m, 1H,  $\text{CH}_2\text{-O}$ ), 3.81-3.85 (m, 1H,  $\text{CH}_2\text{-O}$ ), 4.27-4.32 (m, 2H,  $\text{CH}_2\text{-O}$ ), 5.25 (s, 2H, NH), 5.31-5.45 (dd,  $J_1$  9.80,  $J_2$  21.66 Hz, 1H,  $\text{CH}^*$ ), 7.10-7.4 (m, 4H, H-Ar), 7.56 (s, 1H, NH) ppm.  $\delta_{\text{C}}(100 \text{ MHz}, \text{CDCl}_3)$  16.68, 16.87, 24.2, 53.5, 63.45, 64.54, 124.7, 126.2, 132.4, 135.45, 135.95, 136.1, 160.4 ppm. Ms (m/z): 301.2 (M+1). Anal. Calc. for  $\text{C}_{13}\text{H}_{21}\text{N}_2\text{O}_4\text{P}$ : C, 52.00; H, 7.05; N, 9.33. Found: C, 52.05; H, 7.09; N, 9.37.

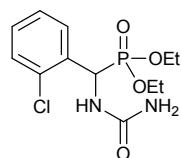

##### Diethyl [ $\alpha$ -ureido-(2-chlorophenyl)]methylphosphonate (Table 2, Entry 3b)

Color solid. Yield 83 %. M.p. 202-204 °C.  $R_f = 0.42$  ( $\text{CH}_2\text{Cl}_2/\text{MeOH}:95/05$ ).  $\nu_{\text{max}}(\text{KBr}/\text{cm}^{-1})$  3424.31, 3323.21, 3203.28, 1687.51, 1220.90.  $\delta_{\text{P}}(120 \text{ MHz}, \text{CDCl}_3)$  22.24 ppm.  $\delta_{\text{H}}(400 \text{ MHz}, \text{CDCl}_3)$  1.04 (t,  $J$  7.20 Hz, 3H,  $\text{CH}_3\text{-CH}_2\text{O}$ ), 1.36 (t,  $J$  7.20 Hz, 3H,  $\text{CH}_3\text{-CH}_2\text{O}$ ), 3.70-3.75 (m, 1H,  $\text{CH}_2\text{-O}$ ), 3.80-3.90 (m, 1H,  $\text{CH}_2\text{-O}$ ), 4.20-4.30 (m, 2H,  $\text{CH}_2\text{-O}$ ), 5.21 (s, 2H, NH), 5.59 (dd,  $J_1=9.60$ ,  $J_2$  22.00 Hz, 1H,  $\text{CH}^*$ ), 7.31-7.54 (m, 4H, H-Ar), 7.60 (s, 1H, NH)

ppm. $\delta_C$ (100 MHz,  $CDCl_3$ ) 16.12, 16.51, 46.79, 48.15, 63.76, 64.01, 127.22, 129.22, 129.55, 133.97, 134.05, 134.58, 158.32 ppm. Ms (m/z): 321.1 (M+1). Anal. Calc. for  $C_{12}H_{18}ClN_2O_4P$ : C, 44.94; H, 5.66; N, 11.05. Found: C, 45.02; H, 5.61; N, 11.01.

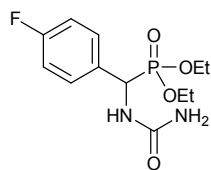

#### Diethyl [ $\alpha$ -ureido-(4-fluorophenyl)]methylphosphonate (Table 2, Entry 5b)

White solid. Yield 81 %. M.p. 198-200 °C.  $R_f = 0.40$  ( $CH_2Cl_2/MeOH:95/05$ ).  $\nu_{max}$  (KBr/ $cm^{-1}$ ) 3447.46, 3330.45, 3259.60, 1689.16, 1238.12.  $\delta_p$ (100 MHz,  $CDCl_3$ ) 23.12 ppm.  $\delta_H$  (250 MHz,  $CDCl_3$ ) 1.04 (t,  $J$  7.11 Hz, 3H,  $CH_3-CH_2O$ ), 1.38 (t,  $J$  6.92 Hz, 3H,  $CH_3-CH_2O$ ), 3.67-3.70 (m, 1H,  $CH_2-O$ ), 3.87-3.90 (m, 1H,  $CH_2-O$ ), 4.21-4.25 (m, 2H,  $CH_2-O$ ), 5.19 (s, 2H, NH), 5.31-5.48 (dd,  $J_1$  9.96,  $J_2$  21.81, Hz, 1H, CH\*), 7.21-7.48 (m, 4H, H-Ar), 7.54 (s, 1H, NH) ppm.  $\delta_C$  (100 MHz,  $CDCl_3$ ) 16.18, 16.47, 54.26, 64.02, 64.13, 126.24, 126.76, 130.27, 130.36, 134.00, 136.50, 161.06 ppm. Ms (m/z): 305 (M+1). Anal. Calc. for  $C_{12}H_{18}FN_2O_4P$ : C, 47.37; H, 5.96; N, 9.21. Found: C, 47.29; H, 5.92; N, 9.26.

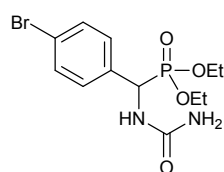

#### Diethyl [ $\alpha$ -ureido-(4-bromophenyl)]methylphosphonate (Table 2, Entry 7b)

White solid. Yield 79 %. M.p. 188-190 °C.  $R_f = 0.40$  ( $CH_2Cl_2/MeOH:95/05$ ).  $\nu_{max}$  (KBr/ $cm^{-1}$ ) 3446.50, 3218.4, 3213.02, 1660.49, 1559.08, 1238.02.  $\delta_C$ (120 MHz,  $CDCl_3$ ) 21.23 ppm.  $\delta_H$  (250 MHz,  $CDCl_3$ ) 1.14 (t,  $J$  6.94 Hz, 3H,  $CH_3-CH_2O$ ), 1.41 (t,  $J$  6.87 Hz, 3H,  $CH_3-CH_2O$ ), 3.76-3.81 (m, 1H,  $CH_2-O$ ), 3.88-3.92 (m, 1H,  $CH_2-O$ ), 3.99-4.27 (m, 2H,  $CH_2-O$ ), 5.21 (s, 2H, NH), 5.25-5.48 (dd,  $J_1$  9.89,  $J_2$  22.03 Hz, 1H, CH\*), 7.21-7.52 (m, 4H, H-Ar), 7.6 (s, 1H, NH) ppm.  $\delta_C$  (75 MHz,  $CDCl_3$ ) 16.20, 16.42, 53.80, 63.85, 64.08, 124.7, 126.2, 127.05, 128.12, 132.4, 137.45, 160.04 ppm. Ms (m/z): 366 (M+1). Anal. Calc. for  $C_{12}H_{18}BrN_2O_4P$ : C, 39.56; H, 4.94; N, 7.69. Found: C, 39.48; H, 4.88; N, 7.57.

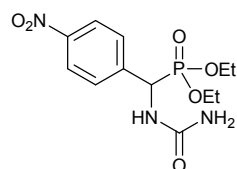

#### Diethyl [ $\alpha$ -ureido-(4-nitrophenyl)]methylphosphonate (Table 2, Entry 8b)

White solid. Yield 85 %. M.p. 203-205 °C.  $R_f = 0.45$  ( $CH_2Cl_2/MeOH:95/05$ ).  $\nu_{max}$  (KBr/ $cm^{-1}$ ) 3433.35, 3315.6, 3224.56, 1666, 1242, 1023  $cm^{-1}$ .  $\delta_p$ (120 MHz,  $CDCl_3$ ) 21.57 ppm.  $\delta_H$  (400 MHz,  $CDCl_3$ ) 1.03 (t,  $J$  7.20 Hz, 3H,  $CH_3-CH_2O$ ), 1.31 (t,  $J$  6.89 Hz, 3H,  $CH_3-CH_2O$ ), 3.60-

3.64 (m, 1H, CH<sub>2</sub>-O), 3.85-3.91 (m, 1H, CH<sub>2</sub>-O), 4.11-4.17 (m, 2H, CH<sub>2</sub>-O), 5.14 (s, 2H, NH), 5.17-5.21 (dd, *J*<sub>1</sub> 9.25, *J*<sub>2</sub> 21.75 Hz, 1H, CH\*), 7.12-7.23 (m, 5H, H-Ar), 7.26 (s, 1H, NH) ppm.  $\delta_C$  (100 MHz, CDCl<sub>3</sub>) 16.32, 16.41, 55.42, 63.14, 63.33, 127.06, 126.31, 126.36, 128.55, 136.58, 136.58, 161.68 ppm. Ms (m/z): 332 (M+1). Anal. Calc. for C<sub>12</sub>H<sub>19</sub>N<sub>2</sub>O<sub>4</sub>P: C, 50.35; H, 6.69; N, 9.79. Found: C, 50.21; H, 6.73; N, 9.78.

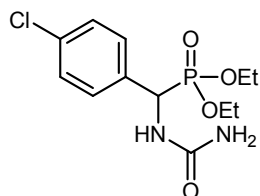

**Diethyl [ $\alpha$ -ureido-(4-chlorophenyl)]methyl phosphonate (Table 2, Entry 8b)**

White solid. Yield 80 %. M.p. 201-203 °C. *R<sub>f</sub>* = 0.42 (CH<sub>2</sub>Cl<sub>2</sub>/MeOH:95/05).  $\nu_{\max}$  (KBr/cm<sup>-1</sup>) 3436.17, 3321.12, 3262.15, 1689.49, 1239.69.  $\delta_P$  (120 MHz, CDCl<sub>3</sub>) 21.82 ppm.  $\delta_H$  (400 MHz, CDCl<sub>3</sub>) 1.10 (t, *J* 7.03 Hz, 3H, CH<sub>3</sub>-CH<sub>2</sub>O), 1.34 (t, *J* 7.06 Hz, 3H, CH<sub>3</sub>-CH<sub>2</sub>O), 3.69-3.73 (m, 1H, CH<sub>2</sub>-O), 3.85-3.99 (m, 1H, CH<sub>2</sub>-O), 4.08-4.15 (m, 2H, CH<sub>2</sub>-O), 5.26 (s, 2H, NH), 5.31-5.36 (dd, *J*<sub>1</sub> 9.40, *J*<sub>2</sub> 20.10 Hz, 1H, CH\*), 7.25-7.34 (m, 4H, H-Ar), 7.55 (s, 1H, NH) ppm.  $\delta_C$  (100 MHz, CDCl<sub>3</sub>) 16.24, 16.51, 53.14, 53.91, 63.59, 63.89, 128.77, 129.42, 129.48, 134.70, 158.58 ppm. Ms (m/z); 321 (M+1). Anal. Calc. for C<sub>12</sub>H<sub>18</sub>ClN<sub>2</sub>O<sub>4</sub>P: C, 44.94; H, 5.66; N, 11.05. Found: C, 45.02; H, 5.61; N, 11.01.

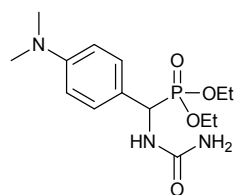

**Diethyl [ $\alpha$ -ureido-(4-dimethylaminophenyl)]methyl phosphonate (Table 2, Entry 11b)**

Yellow solid. Yield 85%. M.p. 192-194 °C. *R<sub>f</sub>* = 0.47 (CH<sub>2</sub>Cl<sub>2</sub>/MeOH:95/05).  $\nu_{\max}$  (KBr/cm<sup>-1</sup>) 3424.31, 3323.21, 3203.26, 1687.51, 1220.90, 1017.76.  $\delta_P$  (CDCl<sub>3</sub>) 21.85.  $\delta_H$  (CDCl<sub>3</sub>, 400 MHz) 1.13 (t, 3H, *J* 7.22 Hz, CH<sub>3</sub>-CH<sub>2</sub>O), 1.39 (t, 3H, *J* 7.12 Hz, CH<sub>3</sub>-CH<sub>2</sub>O), 2.93 (s, 6H, 2CH<sub>3</sub>-N), 3.74-3.83 (m, 1H, CH<sub>2</sub>-O), 3.88-3.97 (m, 1H, CH<sub>2</sub>-O), 4.15-4.30 (m, 2H, CH<sub>2</sub>-O), 5.18 (s, 2H, NH), 5.32 (dd, 1H, *J*<sub>1</sub> 9.96, *J*<sub>2</sub> 21.11 Hz, CH\*), 7.34-7.45 (m, 4H, H-Ar), 7.50 (s, 1H, NH).  $\delta_C$  (CDCl<sub>3</sub>, 100.6 MHz) 16.30, 16.35, 54.5, 54.57, 64.05, 64.10, 127.75, 127.81, 127.94, 135.12, 135.45, 137.60, 159.25 ppm. Ms (m/z): 329.7 (M+1); Anal. Calc. for C<sub>14</sub>H<sub>24</sub>N<sub>3</sub>O<sub>4</sub>P: C, 51.06; H, 7.35; N, 12.76. Found: C, 51.11; H, 7.37, N, 12.75.

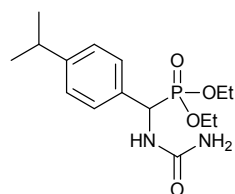

**Diethyl [ $\alpha$ -ureido-(4-isopropylphenyl)]methyl phosphonate (Table 2, Entry 13b)**

Cristal. Yield 85%. M.p. 197-199 °C.  $R_f = 0.46$  (CH<sub>2</sub>Cl<sub>2</sub>/MeOH:95/05).  $\nu_{\max}$ (KBr/cm<sup>-1</sup>) 3443.17, 3362.23, 3252.64, 1664, 1238.02, 1028.42.  $\delta_p$ (CDCl<sub>3</sub>) 21.48.  $\delta_H$  (CDCl<sub>3</sub>, 250 MHz) 1.09 (2d, 6H,  $J$  7.05 Hz, 2CH<sub>3</sub>-CH), 1.11 (t, 3H,  $J$  7.04 Hz, CH<sub>3</sub>-CH<sub>2</sub>O), 1.31 (t, 3H,  $J$  7.11 Hz, CH<sub>3</sub>-CH<sub>2</sub>O), 2.89 (m, 1H, CH-Ar), 3.71-3.79 (m, 1H, CH<sub>2</sub>-O), 3.84-3.91 (m, 1H, CH<sub>2</sub>-O), 4.11-4.24 (m, 2H, CH<sub>2</sub>-O), 5.18 (s, 2H, NH), 5.32 (dd, 1H,  $J_1$  9.91,  $J_2$  19.75 Hz, CH), 7.19-7.49 (m, 4H, H-Ar), 7.51 (s, 1H, NH).  $\delta_C$  (CDCl<sub>3</sub>, 100.6 MHz) 16.8, 16.9, 21.15, 23.14, 34.5, 53.4, 63.5, 64.5, 124.12, 124.56, 127.8, 131.2, 132.3, 139.1, 160.1 ppm. Ms (m/z): 328.7 (M<sup>+</sup>).  
 Anal. Calcd for C<sub>15</sub>H<sub>25</sub>N<sub>2</sub>O<sub>4</sub>P. C, 54.87; H, 7.67; N, 5.53. Found: C, 54.81; H, 7.70; N, 5.56

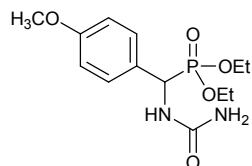

**Diethyl [ $\alpha$ -ureido-(4-methoxyphenyl)] methyl phosphonate (Table 2, Entry 15b)**

Wide solid. Yield 78 %. M.p. 204-206 °C.  $R_f = 0.46$  (CH<sub>2</sub>Cl<sub>2</sub>/MeOH:95/05).  $\nu_{\max}$ (KBr/cm<sup>-1</sup>) 3446.58, 3314.26, 3213.02, 1660.49, 1238.02, 1084.15.  $\delta_p$ (120 MHz, CDCl<sub>3</sub>) 21.15 ppm.  $\delta_H$  (250 MHz, CDCl<sub>3</sub>) 1.18 (t,  $J$  7.20 Hz, 3H, CH<sub>3</sub>-CH<sub>2</sub>O), 1.35 (t,  $J$  7.00 Hz, 3H, CH<sub>3</sub>-CH<sub>2</sub>O), 3.76-3.86 (m, 1H, CH<sub>2</sub>-O), 3.91-3.96 (m, 1H, CH<sub>2</sub>-O), 3.97-4.10 (m, 2H, CH<sub>2</sub>-O), 5.14 (s, 2H, NH<sub>2</sub>), 5.28 (dd,  $J_1$  9.21,  $J_2$  22.40 Hz, 1H, CH\*), 7.10 (dd,  $J$  9.6 Hz, 1H, NH), 7.31 (d,  $J$  8.2 Hz, 2H, H-Ar), 7.52 (d,  $J$  8.2 Hz, 2H, H-Ar) ppm.  $\delta_C$  (100 MHz, CDCl<sub>3</sub>) 16.7, 16.9, 52.5, 53.4, 63.9, 64.7, 123.6, 129.7, 129.9, 131.8, 131.8, 136.5, 159.95 ppm. Ms (m/z): 317.1 (M+1).  
 Anal. Calc. for C<sub>13</sub>H<sub>21</sub>N<sub>2</sub>O<sub>5</sub>P: C, 49.37; H, 6.69; N, 8.86. Found: C, 49.41; H, 6.67; N, 8.84.



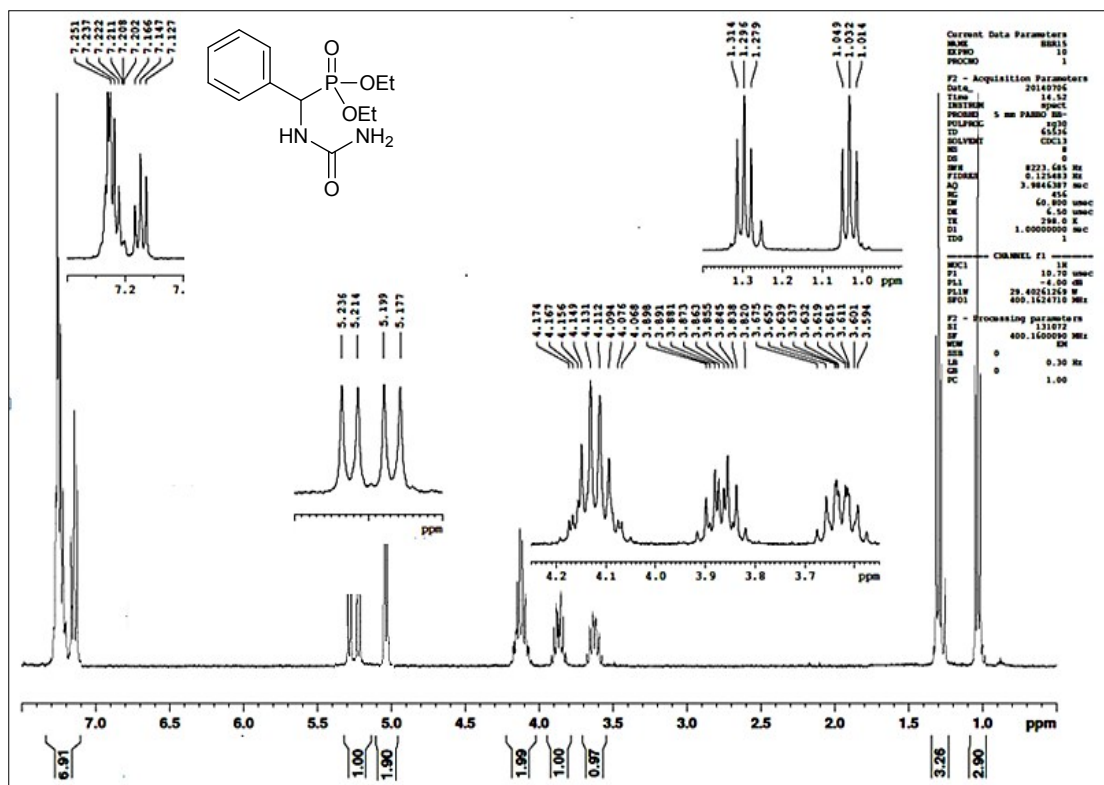

<sup>1</sup>H NMR spectrum: Diethyl [ $\alpha$ -ureido-(phenyl)]methyl phosphonate

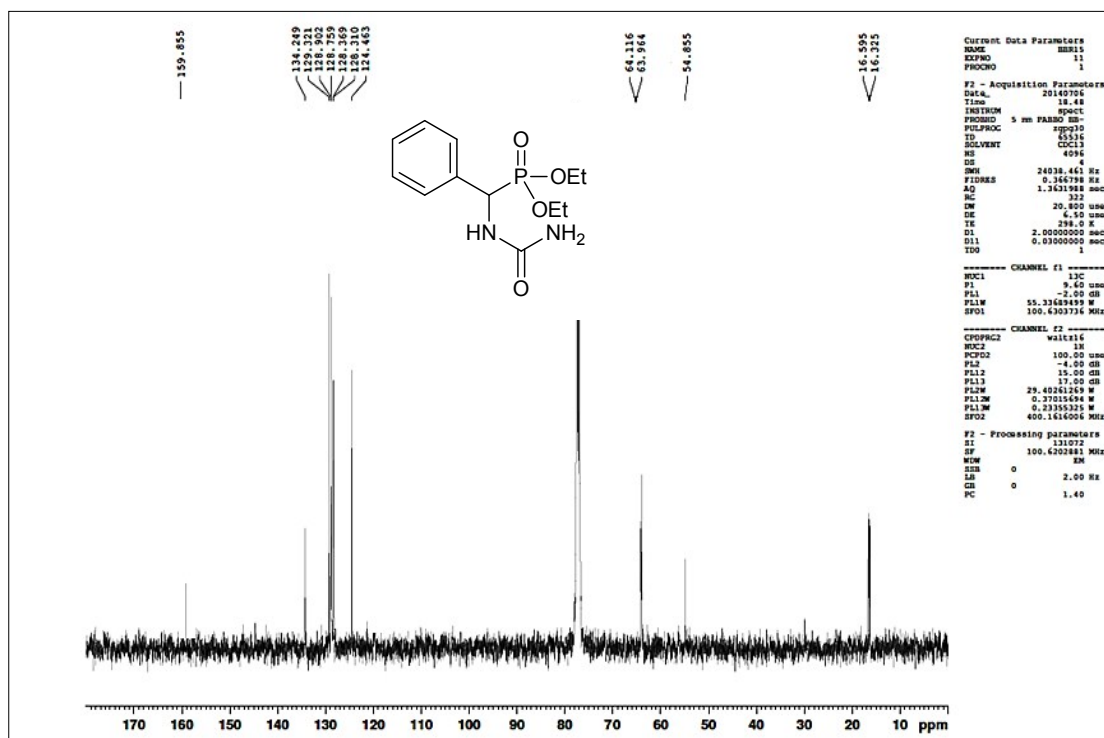

<sup>13</sup>C NMR spectrum: Diethyl [ $\alpha$ -ureido-(phenyl)]methyl phosphonate

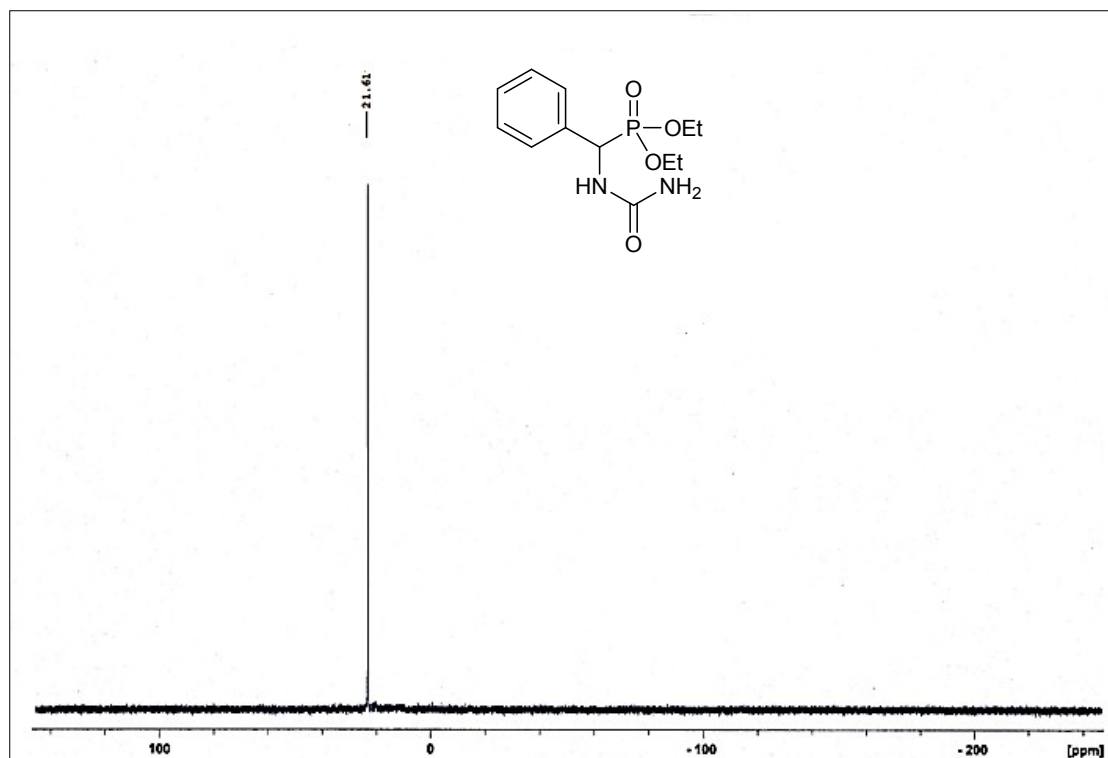

<sup>31</sup>P NMR spectrum: Diethyl [ $\alpha$ -ureido-(phenyl)]methyl phosphonate

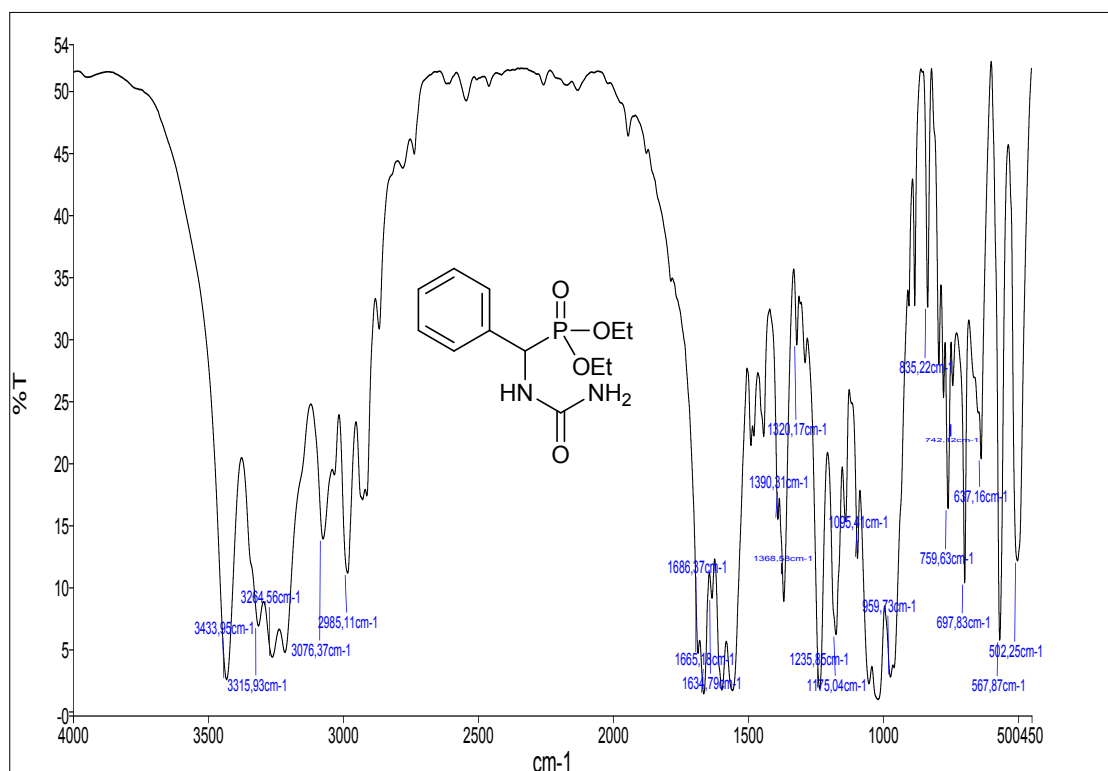

IR spectrum: Diethyl [ $\alpha$ -ureido-(phenyl)]methyl phosphonate

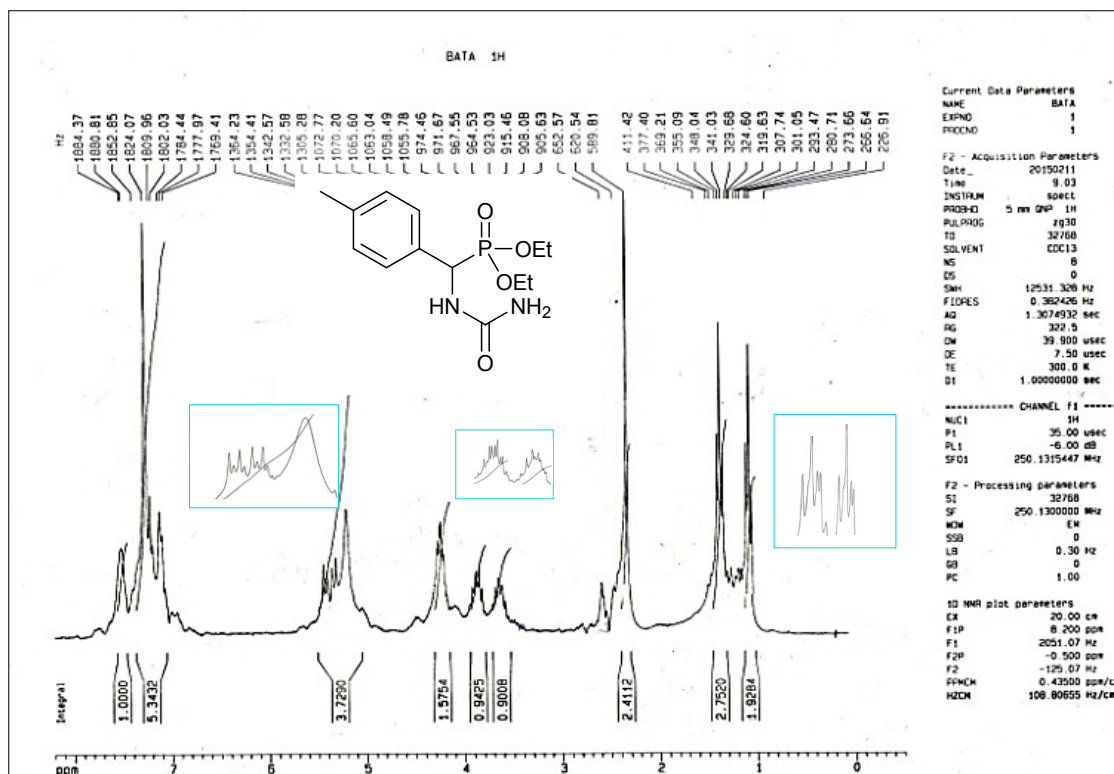

<sup>1</sup>H NMR spectrum: Diethyl [ $\alpha$ -ureido-(4-methylphenyl)]methyl phosphonate

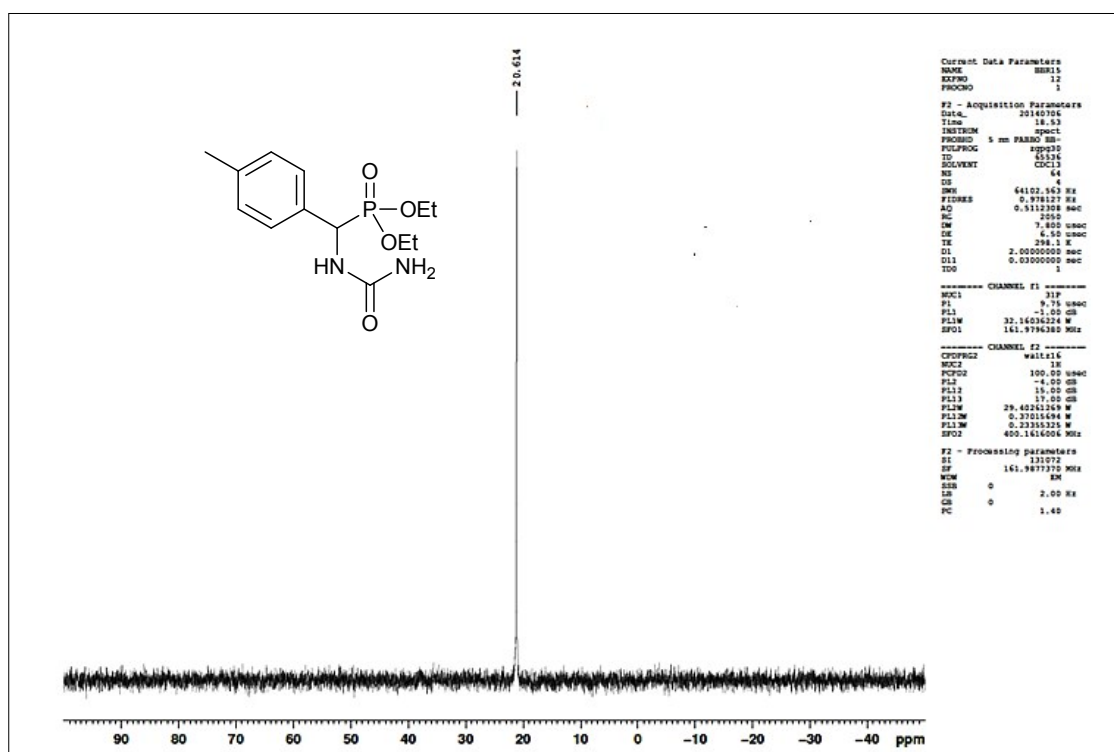

<sup>31</sup>P NMR spectrum: Diethyl [ $\alpha$ -ureido-(4-methylphenyl)]methyl phosphonate

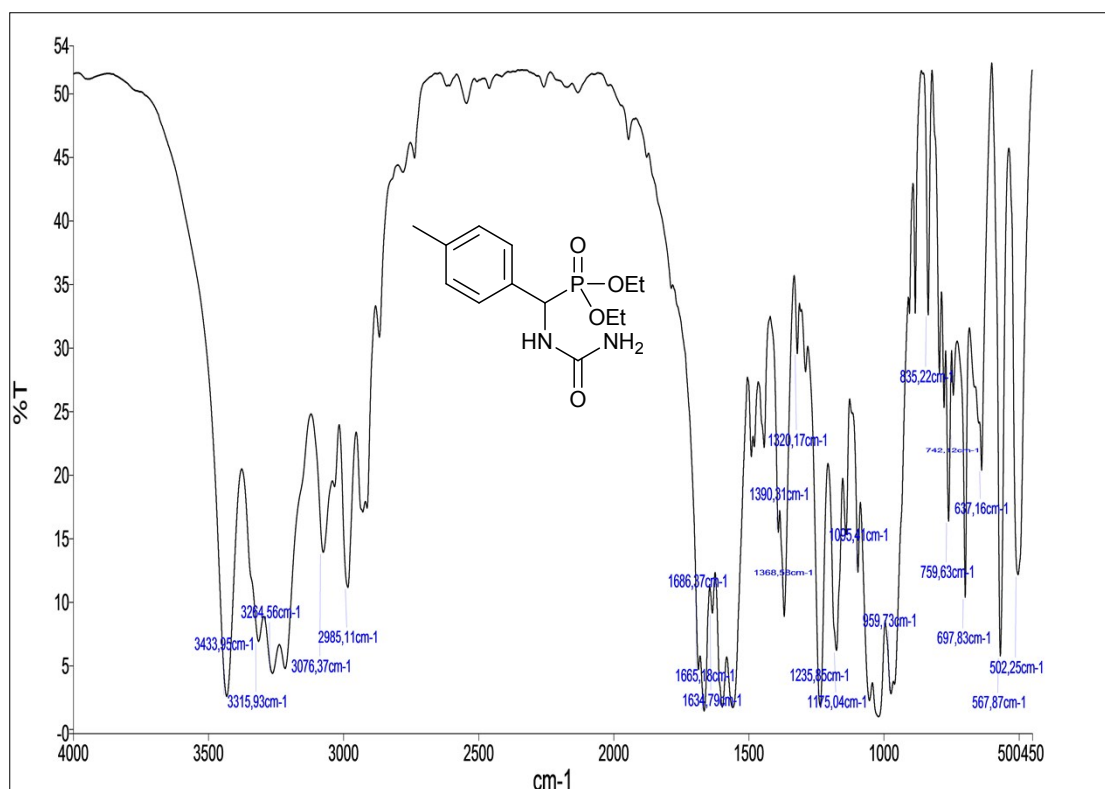

**IR spectrum:Diethyl [α-ureido-(4-methylphenyl)]methyl phosphonate**

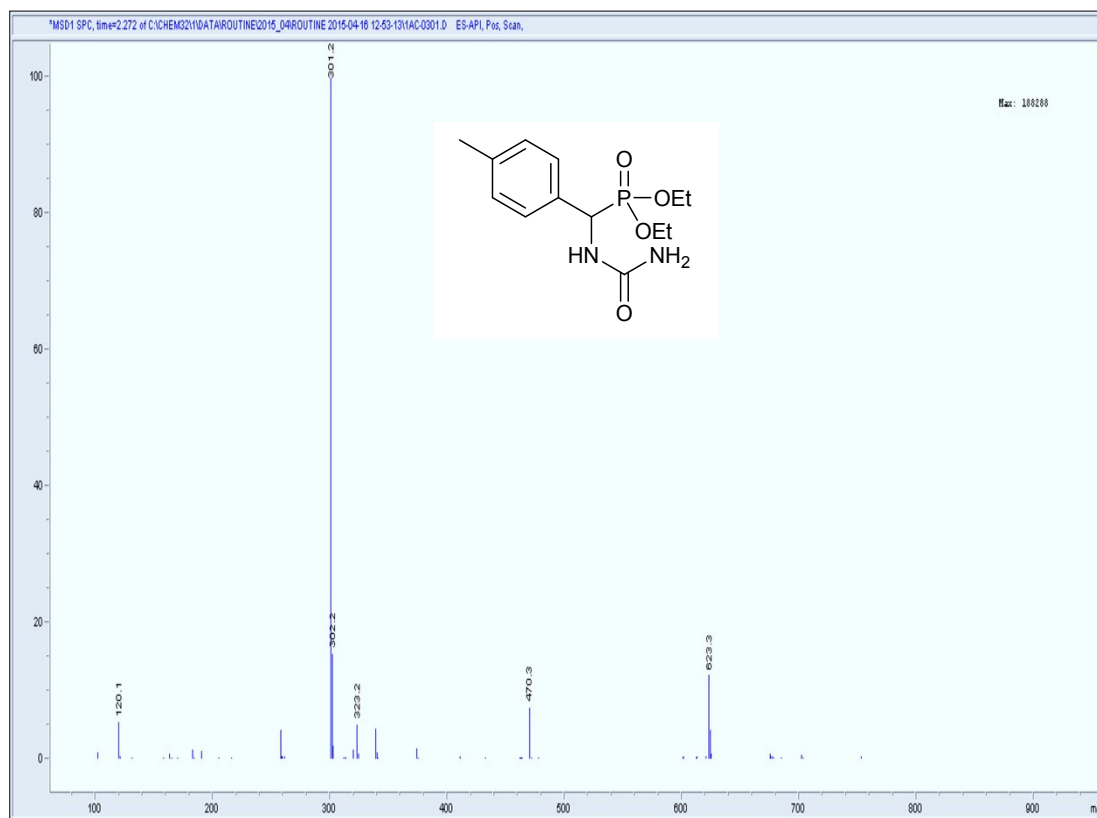

**MS:Diethyl [α-ureido-(4-methylphenyl)]methyl phosphonate**

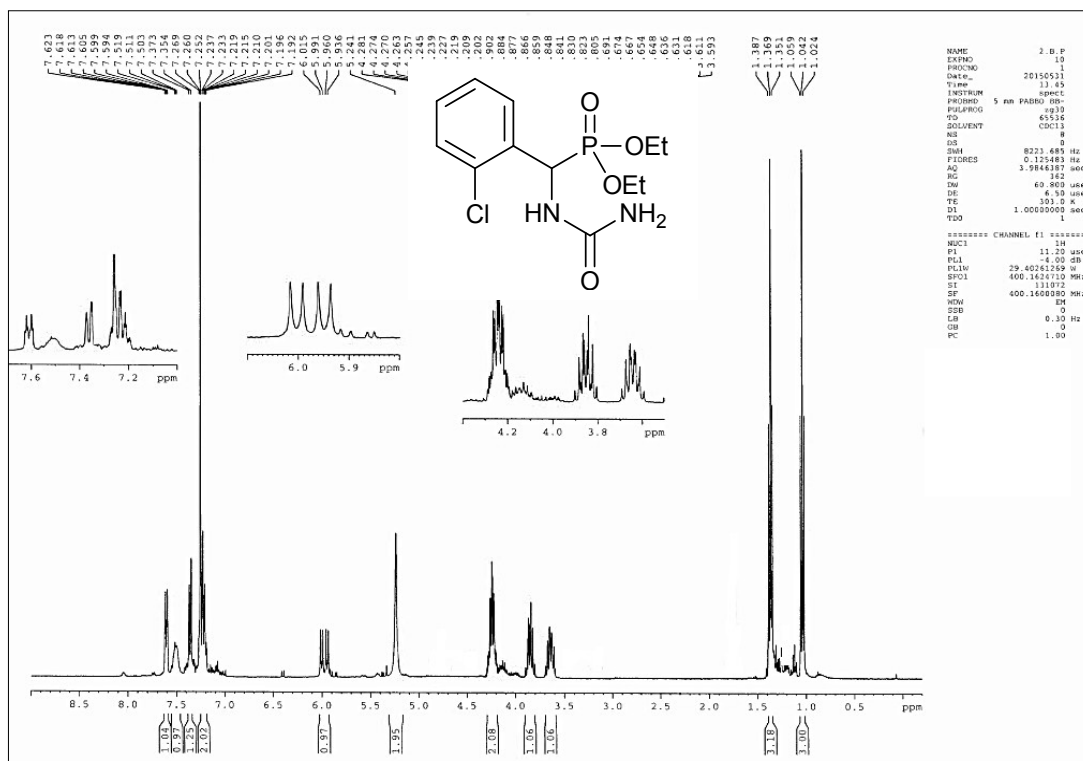

**<sup>1</sup>H NMR spectrum: Diethyl [α-ureido-(2-chlorophenyl)]methyl phosphonate**

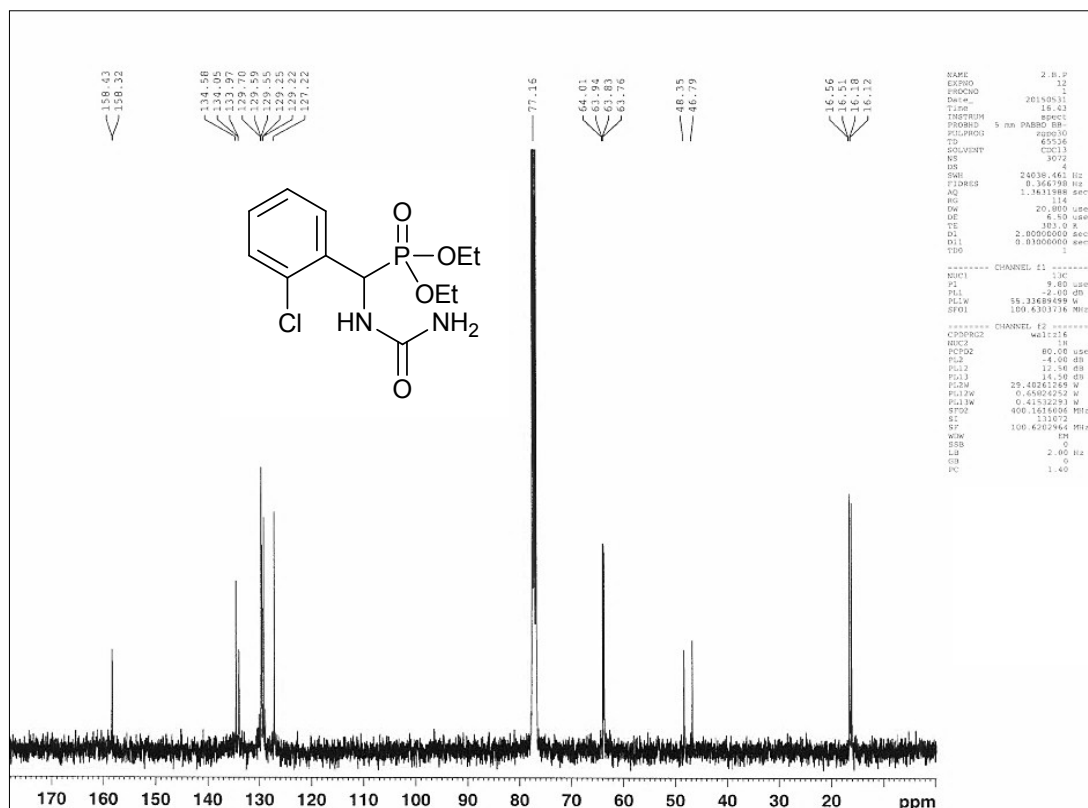

**<sup>13</sup>C NMR spectrum: Diethyl [α-ureido-(2-chlorophenyl)]methyl phosphonate**

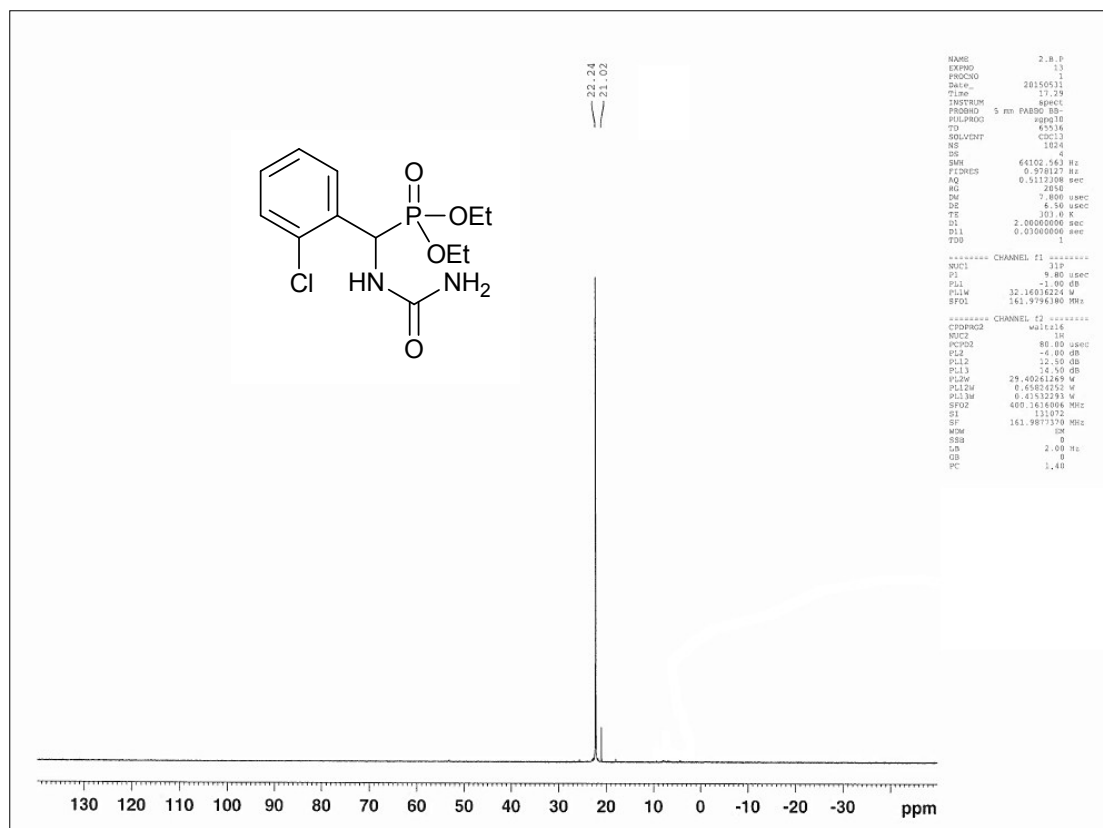

**<sup>31</sup>P NMR spectrum: Diethyl [α-ureido-(2-chlorophenyl)]methyl phosphonate**

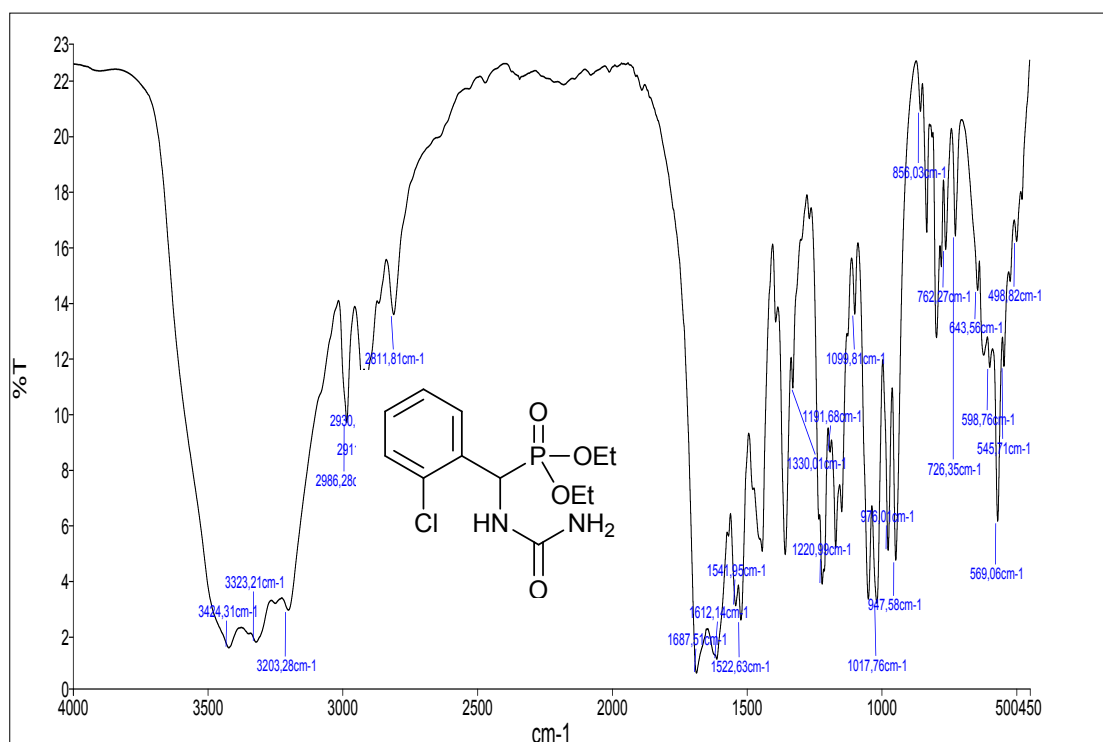

**IR spectrum: Diethyl [α-ureido-(2-chlorophenyl)]methyl phosphonate**

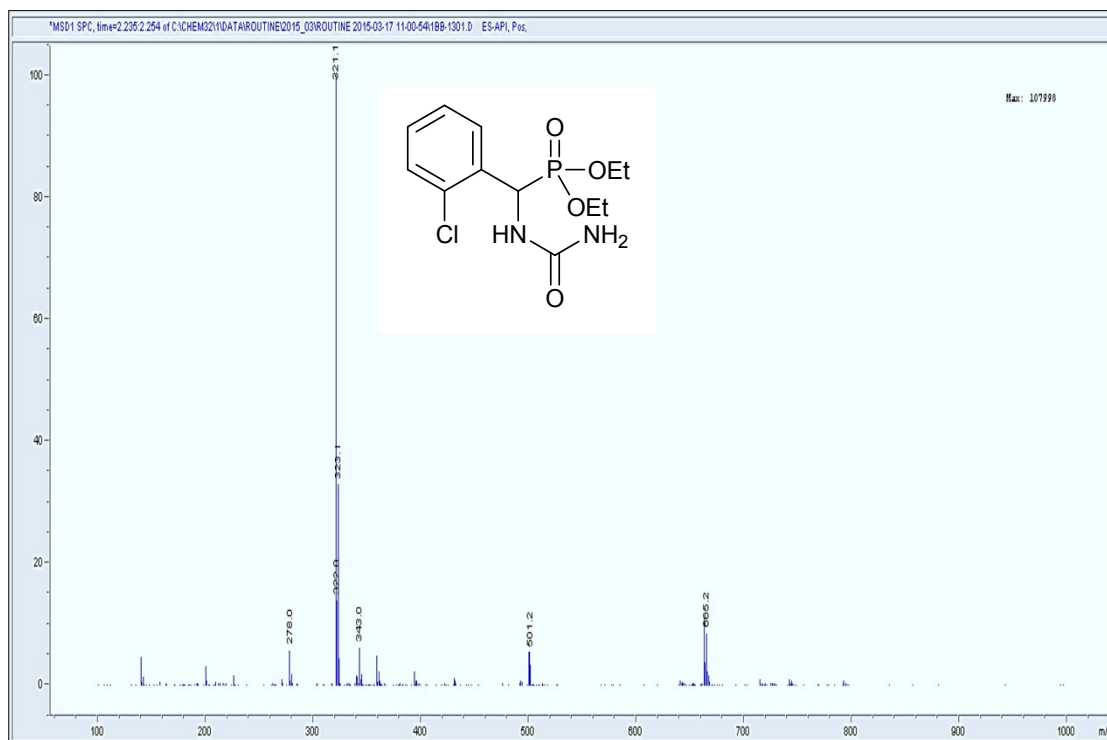

MS:Diethyl [α-ureido-(2-chlorophenyl)]methyl phosphonate

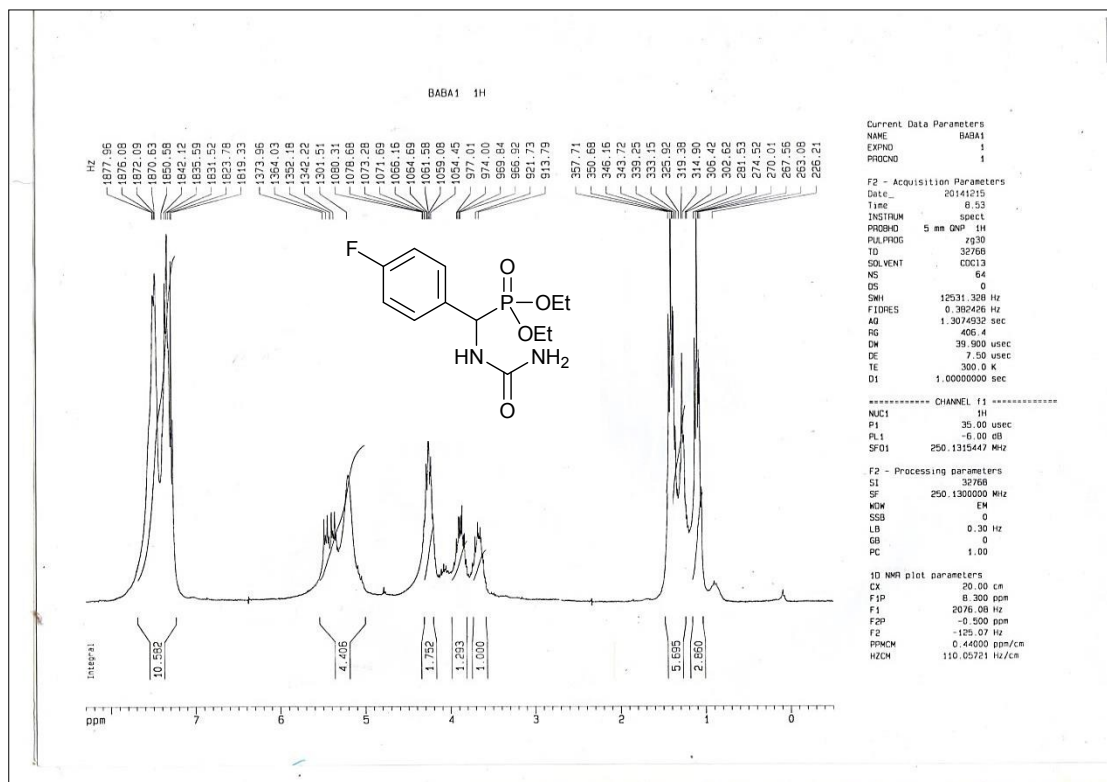

<sup>1</sup>H NMR spectrum: Diethyl [α-ureido-(4-fluorophenyl)]methyl phosphonate

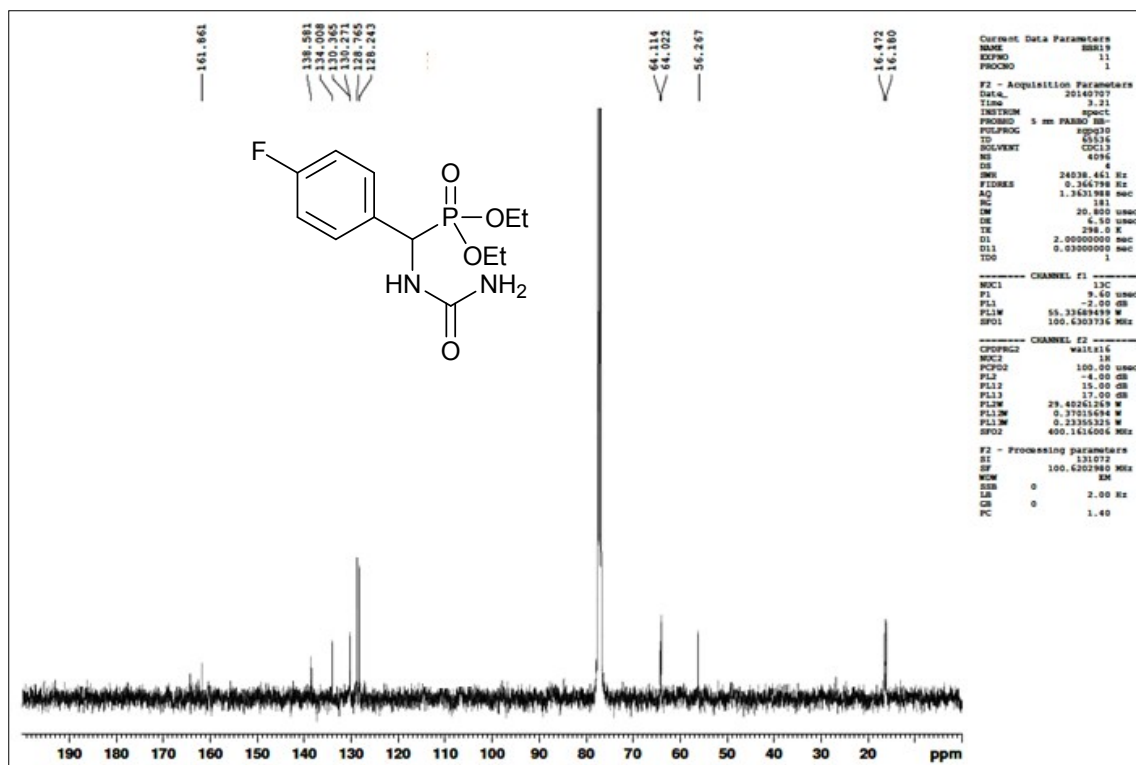

<sup>13</sup>C NMR spectrum: Diethyl [α-ureido-(4-fluorophenyl)] methyl phosphonate

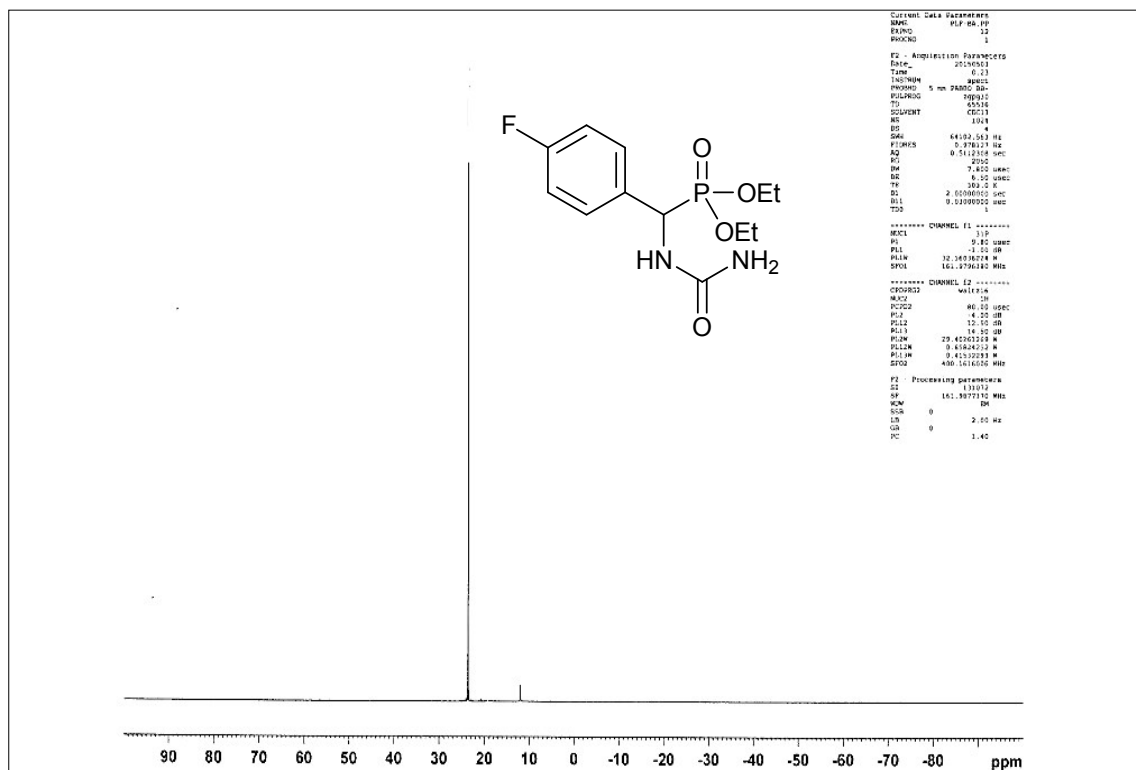

<sup>31</sup>P NMR spectrum: Diethyl [α-ureido-(4-fluorophenyl)] methyl phosphonate



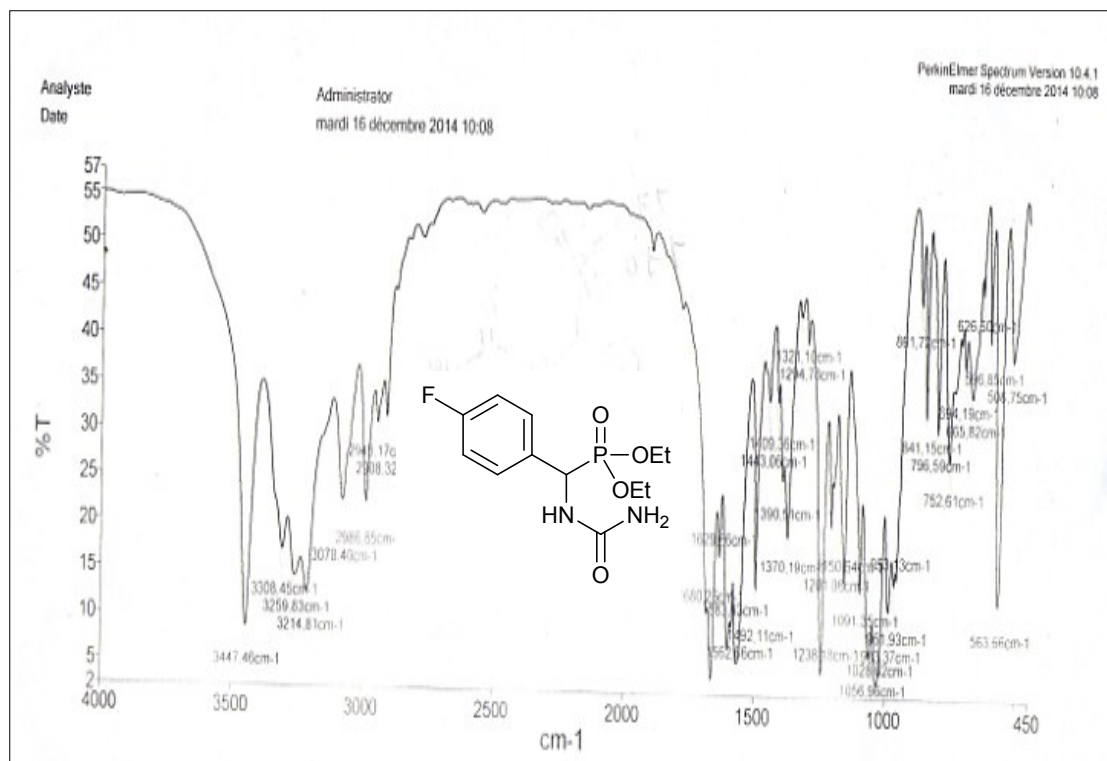

**IR spectrum: Diethyl [α-ureido-(4-fluorophenyl)] methyl phosphonate**

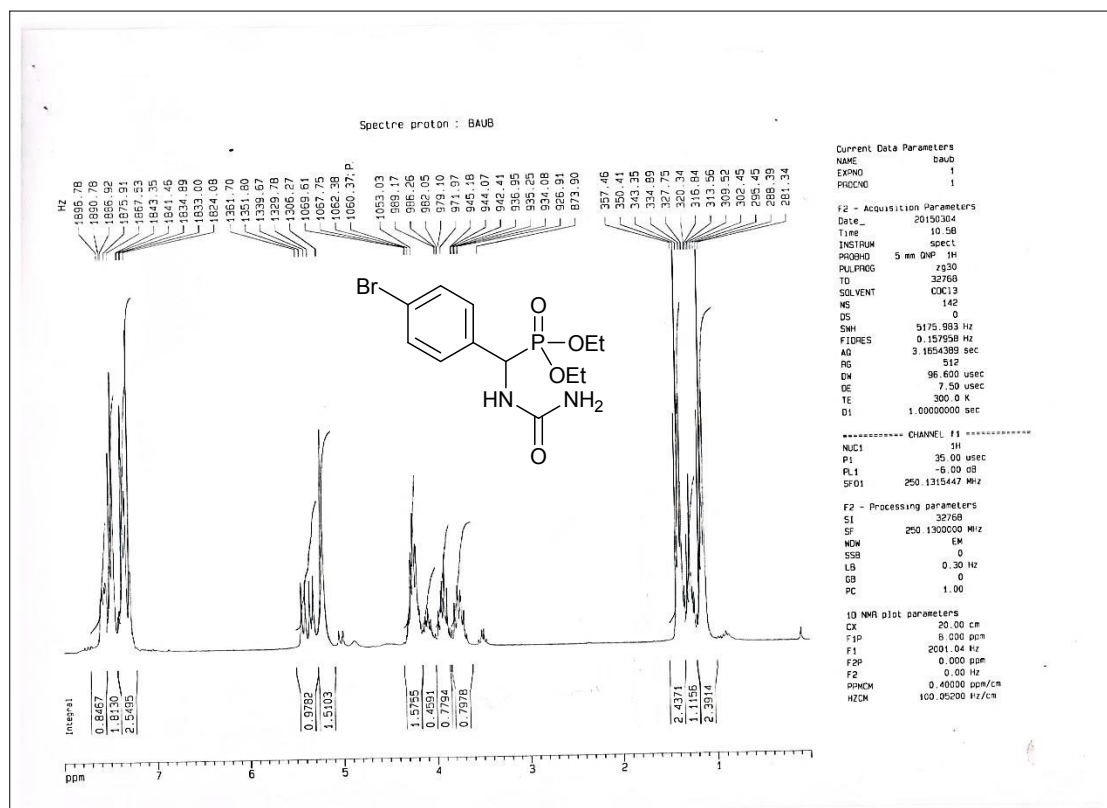

**<sup>1</sup>H NMR spectrum: Diethyl [α-ureido-(4-bromophenyl)] methyl phosphonate**

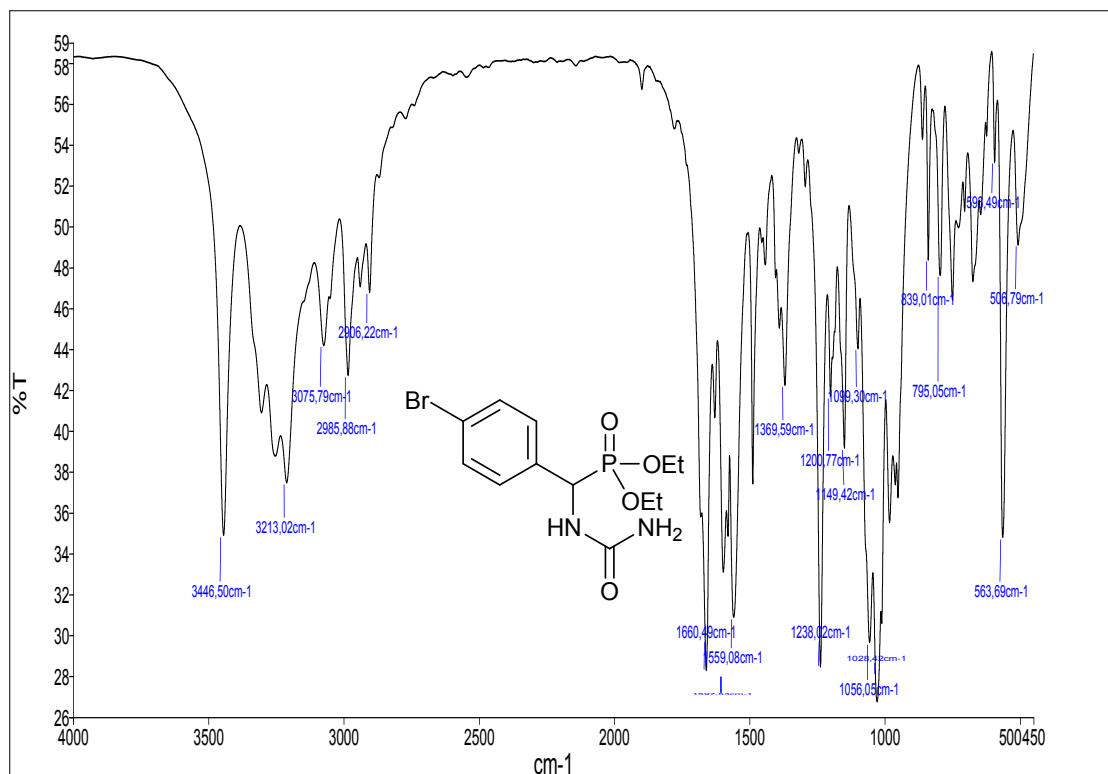

IR spectrum: Diethyl [α-ureido-(4-bromophenyl)] methyl phosphonate

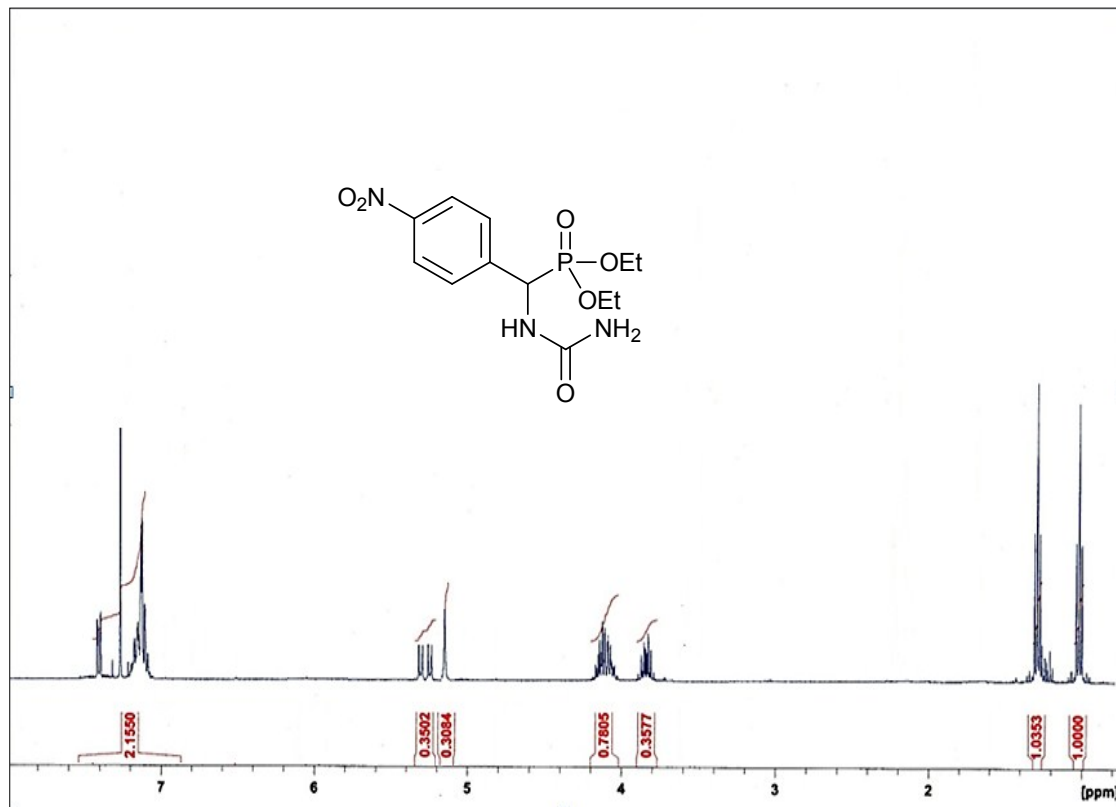

<sup>1</sup>H NMR spectrum: Diethyl [α-ureido-(4-nitrophenyl)] methyl phosphonate

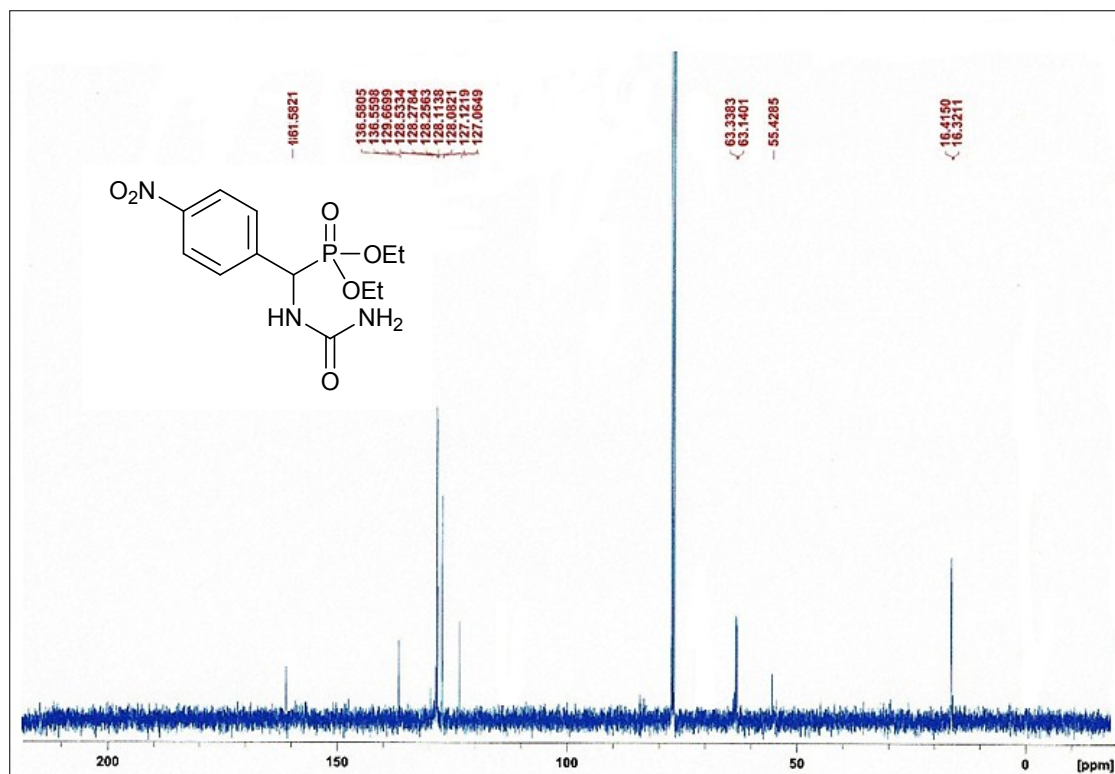

<sup>13</sup>C NMR spectrum: Diethyl [ $\alpha$ -ureido-(4-nitrophenyl)] methyl phosphonate

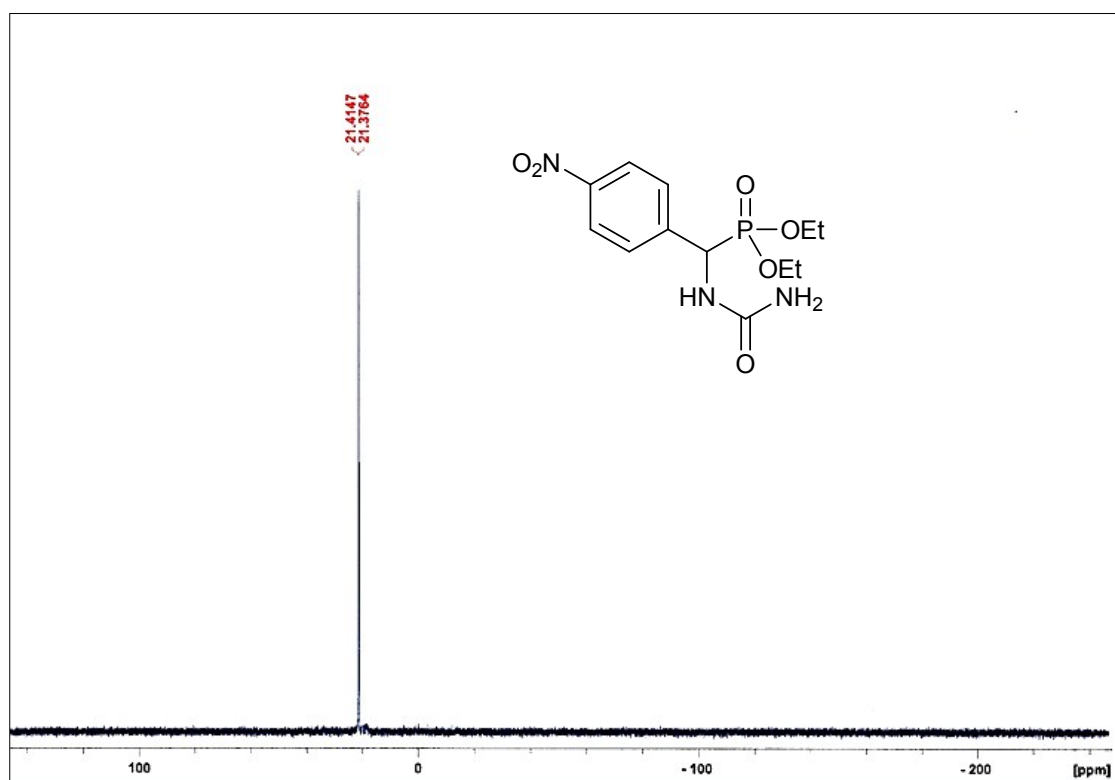

<sup>31</sup>P NMR spectrum: Diethyl [ $\alpha$ -ureido-(4-nitrophenyl)] methyl phosphonate

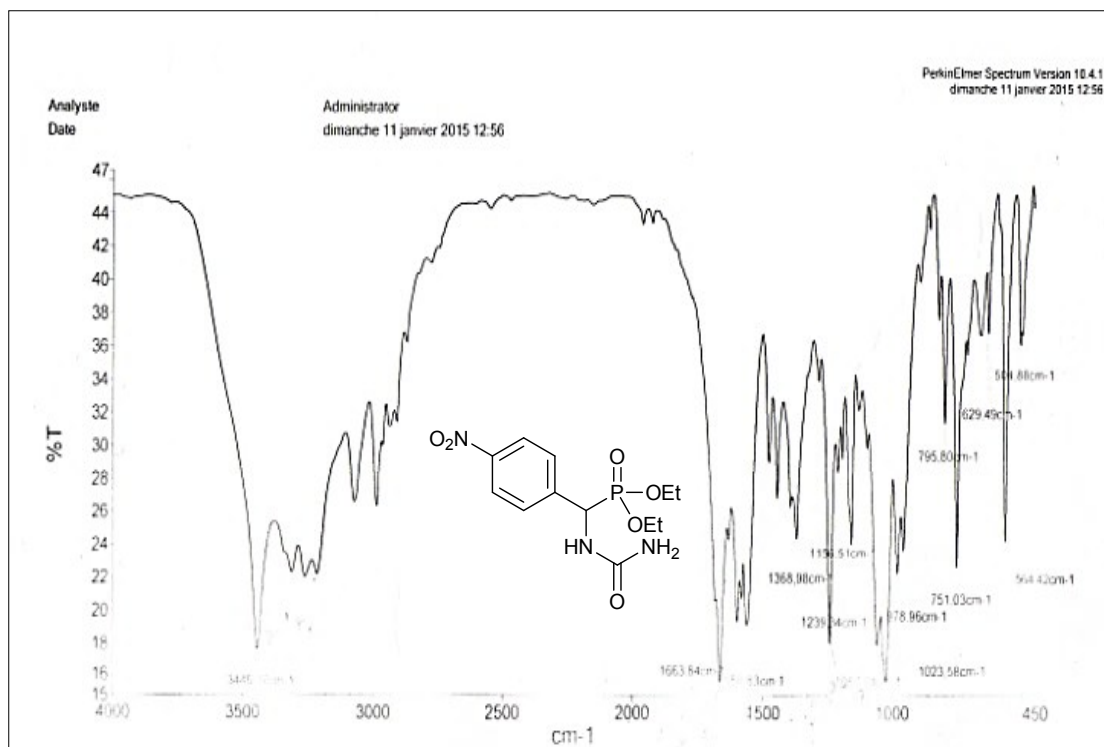

IR spectrum:Diethyl [α-ureido-(4-nitrophenyl)] methyl phosphonate

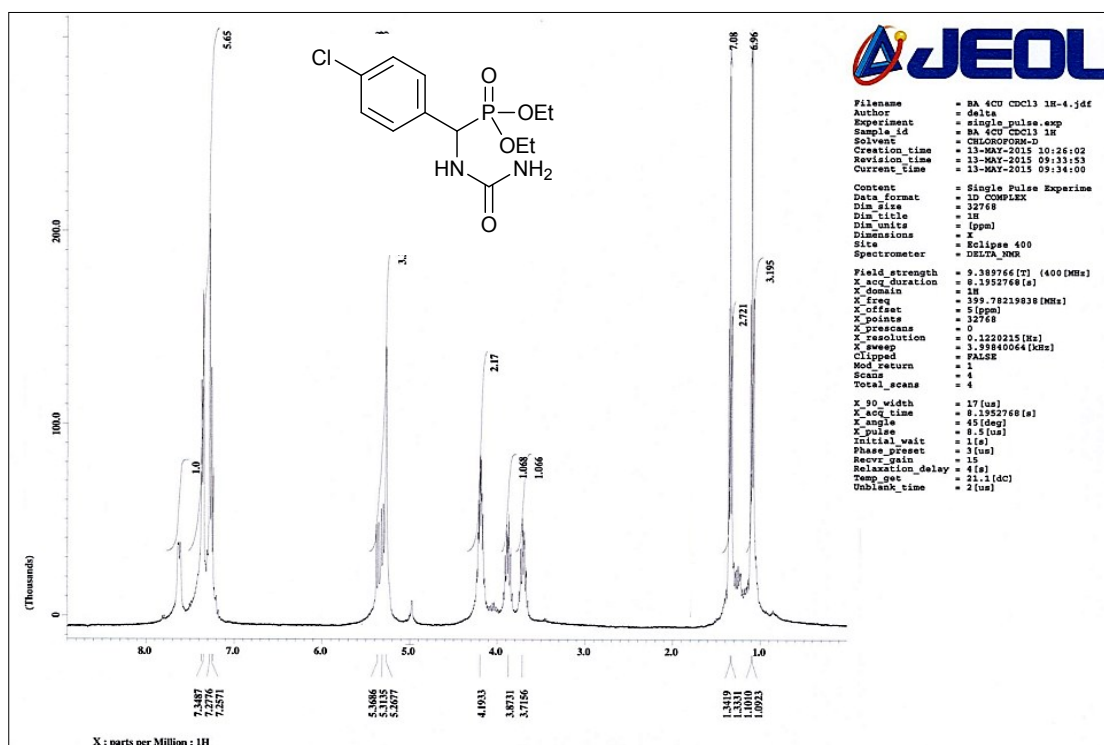

<sup>1</sup>H NMR spectrum:Diethyl [α-ureido-(4-chlorophenyl)] methyl phosphonate

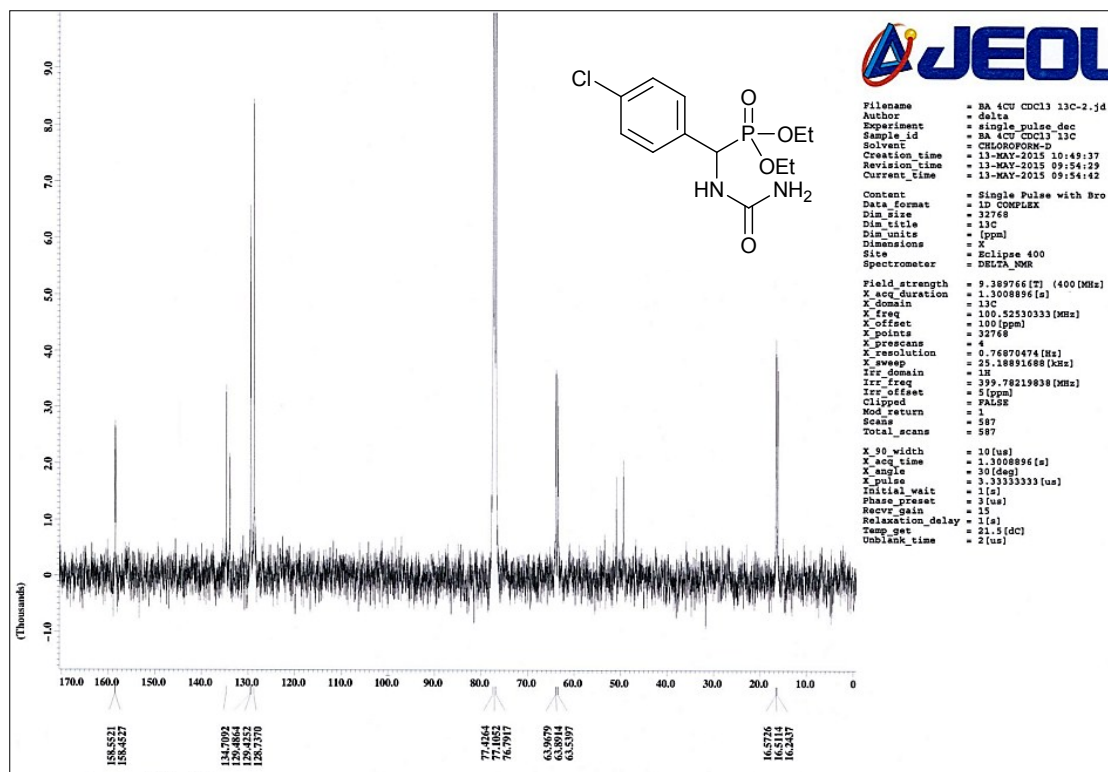

<sup>13</sup>C NMR spectrum: Diethyl [ $\alpha$ -ureido-(4-chlorophenyl)] methyl phosphonate

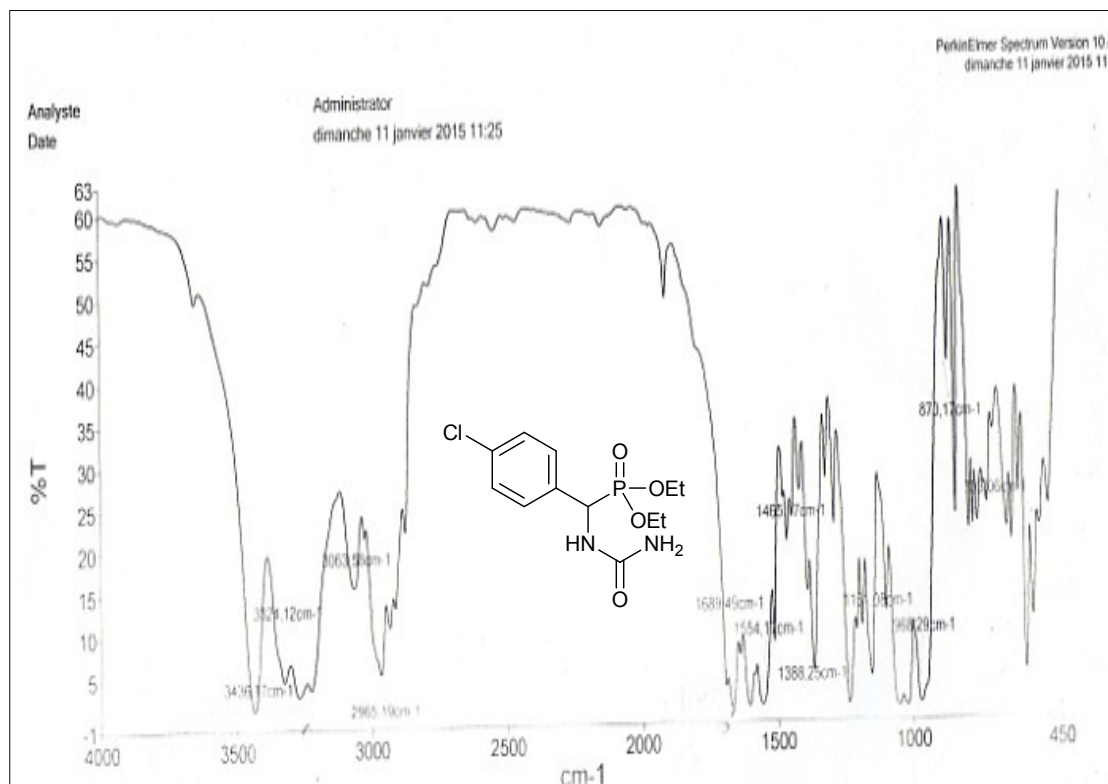

IR spectrum: Diethyl [ $\alpha$ -ureido-(4-chlorophenyl)] methyl phosphonate

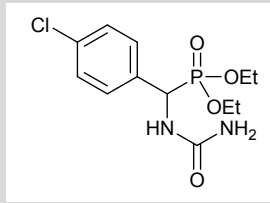

MS:Diethyl [ $\alpha$ -ureido-(4-chlorophenyl)] methyl phosphonate

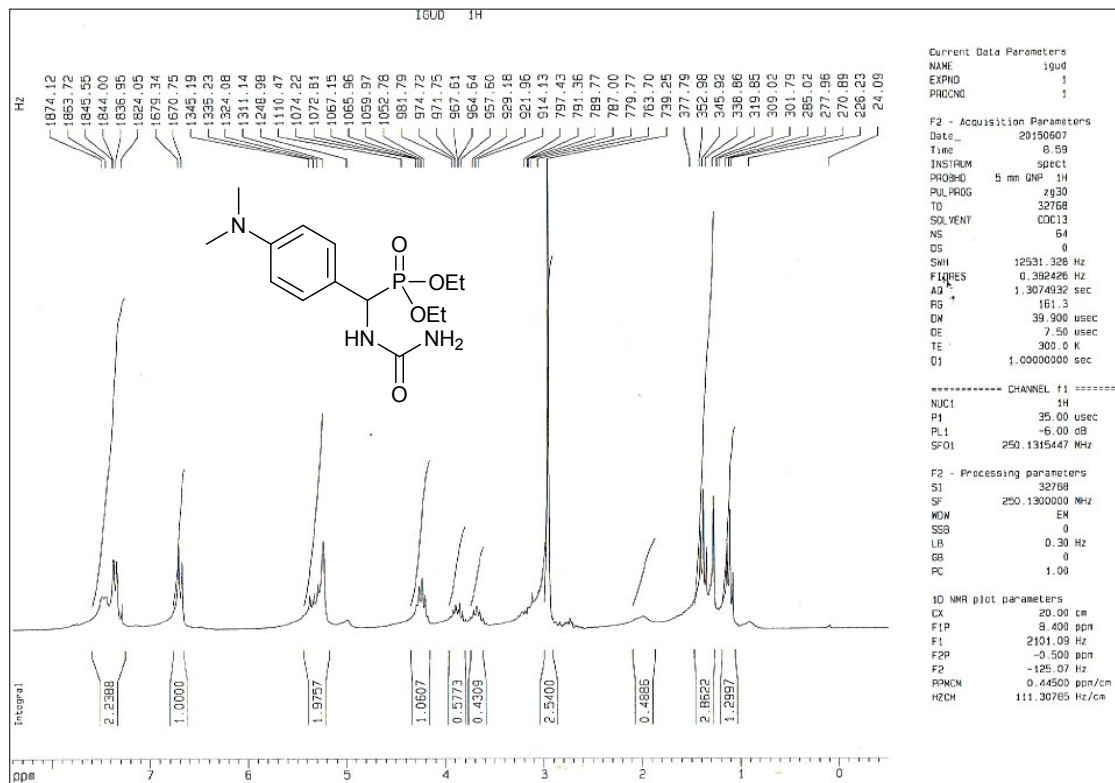

$^1\text{H}$  RMN:Diethyl [ $\alpha$ -ureido-(4-dimethylamino)phenyl]] methyl phosphonate

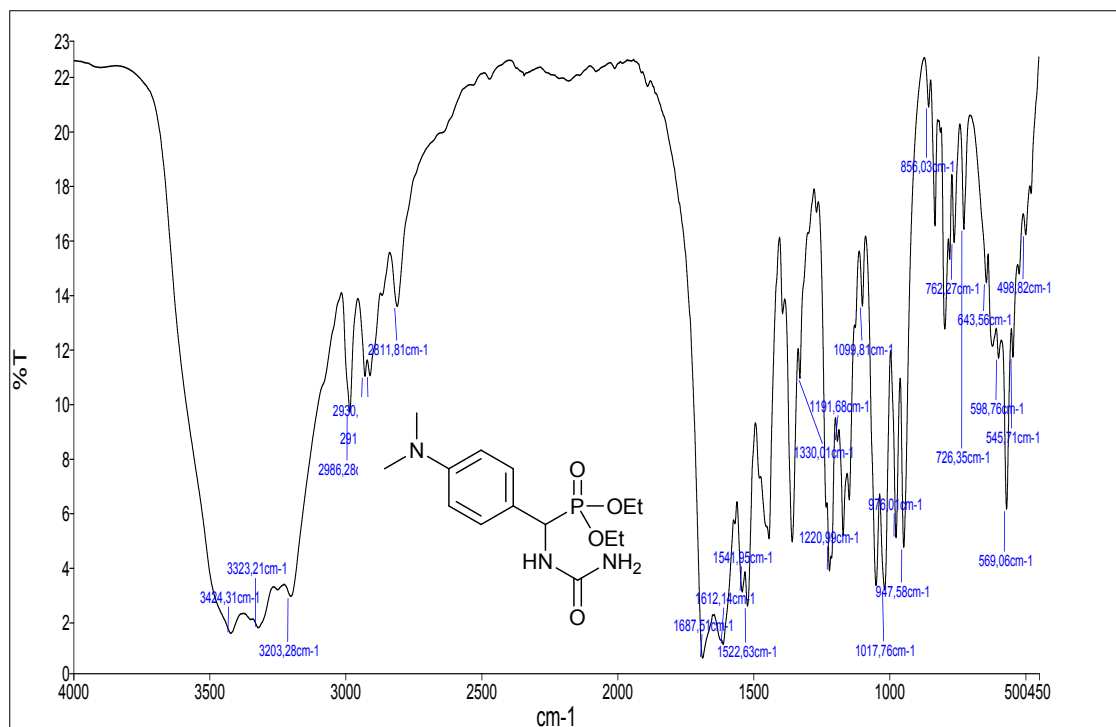

**IR spectrum: Diethyl [α-ureido-(4-dimethylamino)phenyl] methyl phosphonate**

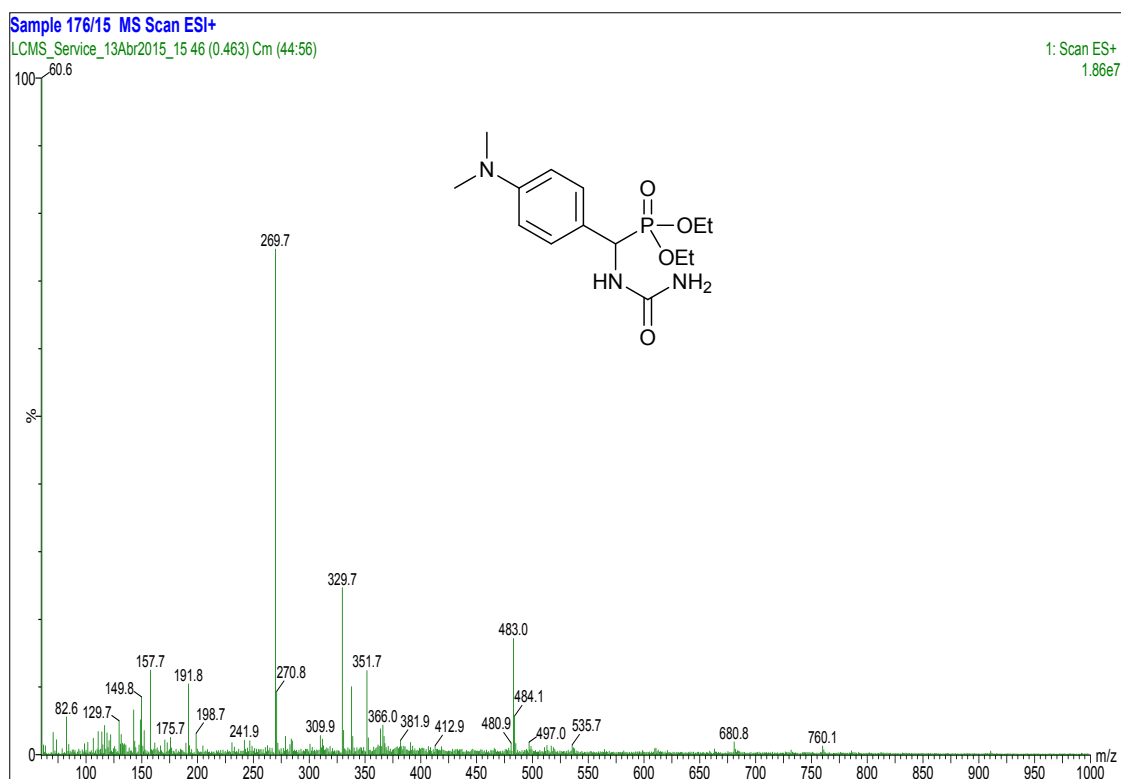

**MS: Diethyl [α-ureido-(4-dimethylamino)phenyl] methyl phosphonate**

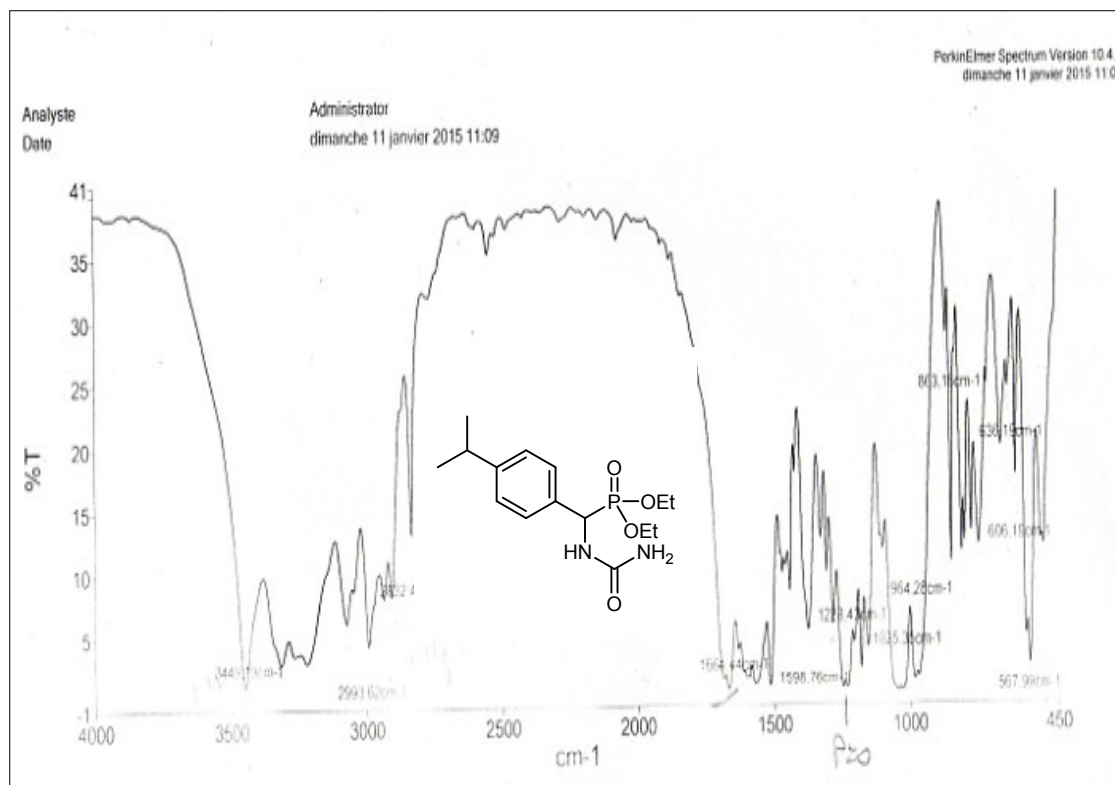

**IR spectrum:Diethyl [α-ureido-(4-isopropylphenyl)]methyl phosphonate**

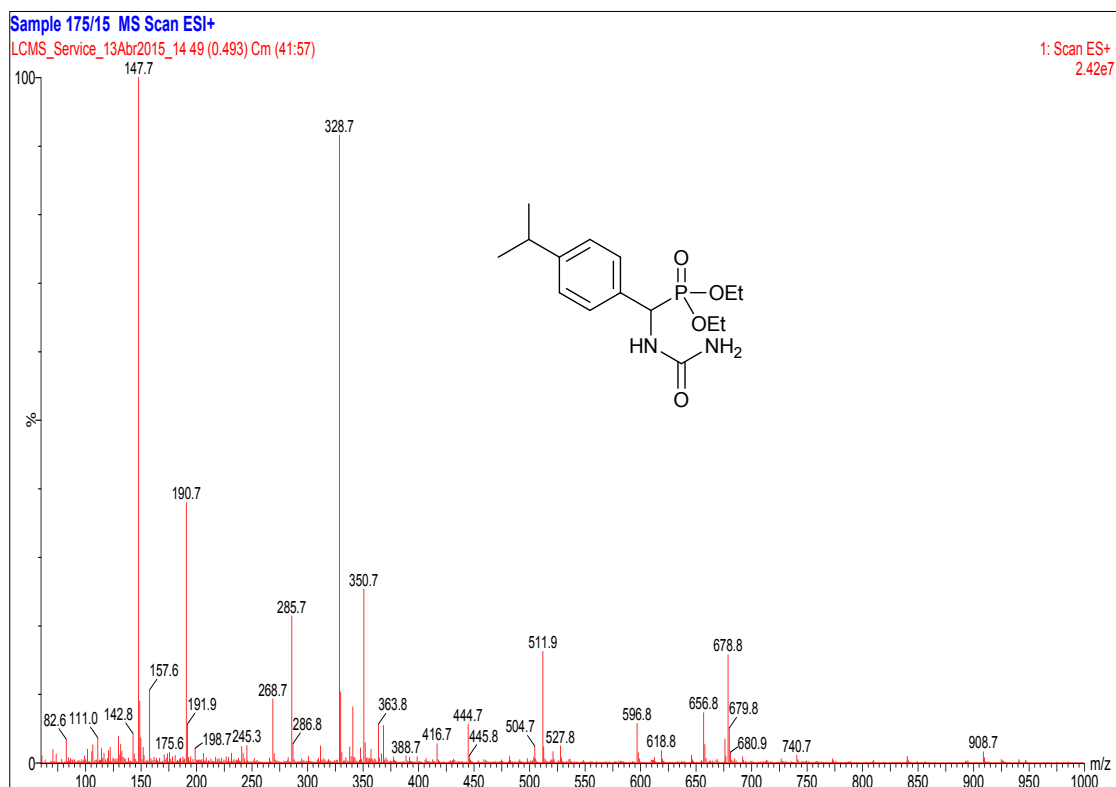

**MS:Diethyl [α-ureido-(4-isopropylphenyl)]methyl phosphonate**



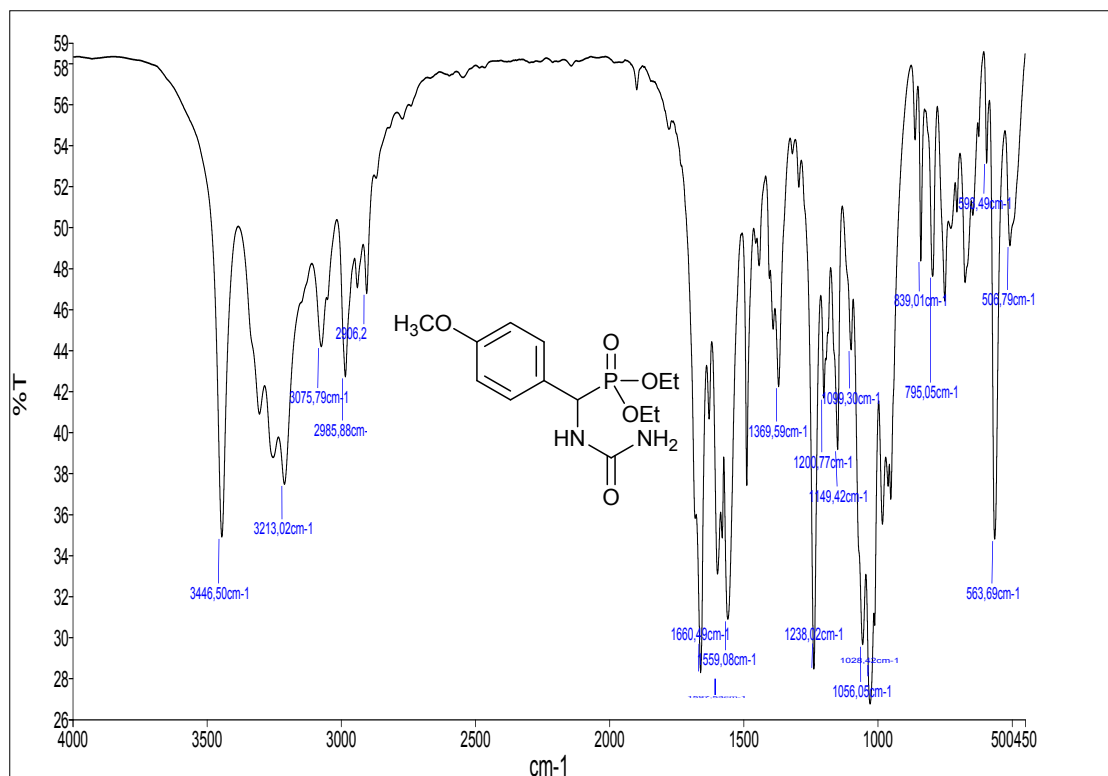

**IR spectrum: Diethyl [α-ureido-(4-methoxyphenyl)]methyl phosphonate**

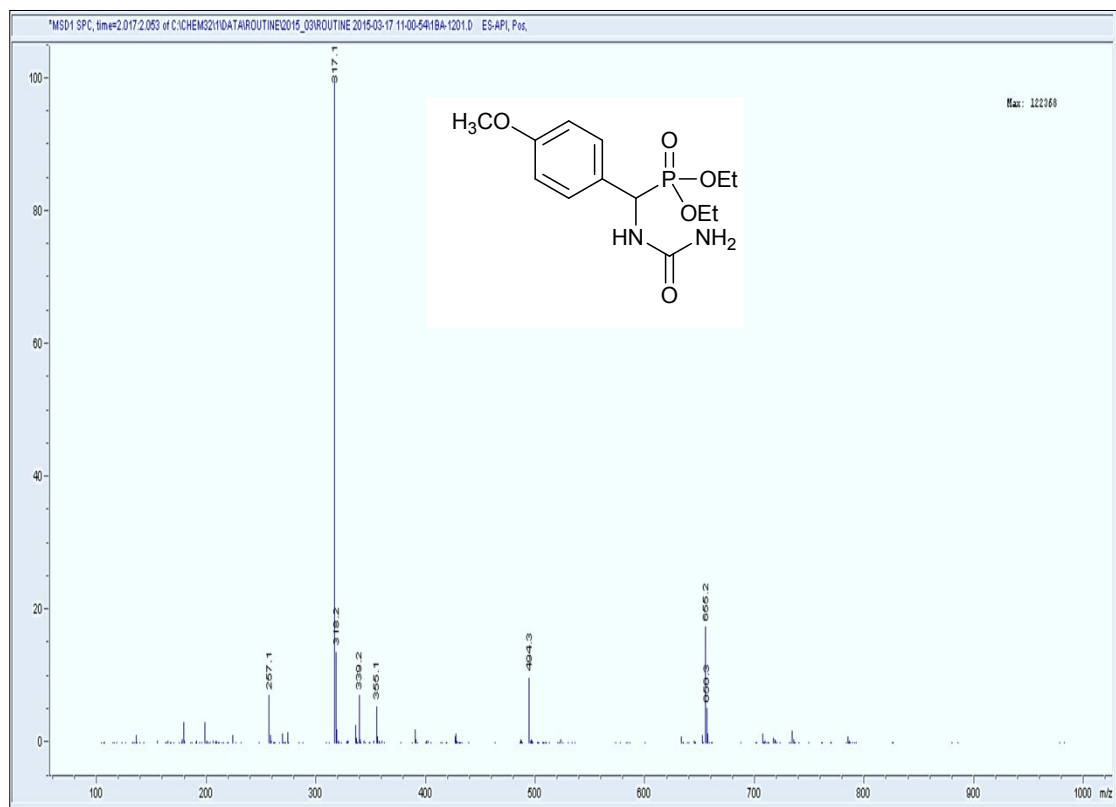

**MS: Diethyl [α-ureido-(4-methoxyphenyl)]methyl phosphonate**
